1  
2  
3  
4  
5  
6  
7  
8  
9  
10  
11  
12  
13  
14  
15  
16  
17  
18  
19  
20  
21  
22  
23  
24  
25  
26  
27  
28

***Comparison of EEG source reconstructed functional networks in healthy subjects elicited during visual oddball task***

Kang Wei Thee<sup>1</sup>, Humaira Nisar<sup>1\*</sup>, Kim Ho Yeap<sup>1</sup>, Wei Meng Tan<sup>2</sup>

<sup>1</sup> Department of Electronic Engineering, Universiti Tunku Abdul Rahman, Kampar, Perak, Malaysia

<sup>2</sup> Pantai Hospital Ipoh, Perak, Malaysia

\* Corresponding author

E-mail: [humaira@utar.edu.my](mailto:humaira@utar.edu.my) (HN)

## 29 **Abstract**

30 In this paper we have reconstructed electroencephalography (EEG) sources using weighted  
31 Minimum Norm Estimator (wMNE) for visual oddball experiment to estimate brain functional  
32 networks. Secondly we have evaluated the impact of time-frequency decomposition algorithms  
33 and scout functions on brain functional networks estimation using phase-locked value (PLV).  
34 Lastly, we compared the difference between target stimuli with response (TR) and non-target  
35 with no response (NTNR) cases in terms of brain functional connectivity (FC). We acquired  
36 the EEG data from 20 healthy participants using 129 channels EEG sensor array for visual  
37 oddball experiment. Three scout functions: i) MEAN, ii) MAX and iii) PCA were used to  
38 extract the regional time series signals. We transformed the regional time series signals into  
39 complex form using two methods: i) Wavelet Transform (WT) and ii) Hilbert Transform (HT).  
40 The instantaneous phases were extracted from the complex form of the regional time series  
41 signals. The FC was estimated using PLV. The joint capacity of the time-frequency  
42 decomposition algorithms/scout functions applied to reconstructed EEG sources was evaluated  
43 using two criteria: i) localization index (LI) and ii) R. The difference in FC between TR and  
44 NTNR cases was evaluated using these two criteria. Our results show that the WT has higher  
45 impact on LI values and it is better than HT in terms of consistency of the results as the standard  
46 deviation (SD) of WT is lower. In addition, WT/PCA pair is better than other pairs in terms of  
47 consistency as the SD of the pair is lower. This pair is able to estimate the connectivity within  
48 parietal region which corresponds to P300 response; although WT/MEAN is also able to do  
49 that, However, WT/PCA has lower SD than WT/MEAN. Lastly, the differences in connectivity  
50 between TR and NTNR cases over parietal, central, right temporal and limbic regions which  
51 correspond to target detection, P300 response and motor response were observed. Therefore,  
52 we conclude that the output of the connectivity estimation might be affected by time-frequency  
53 decomposition algorithms/scout functions pairs. Among the pairs, WT/PCA yields best results

54 for the visual oddball task. Moreover, TR and NTNR cases are different in terms of estimated  
55 functional networks.

56

## 57 **Introduction**

58 Brain connectivity may be defined as the links between different units of the brain. These links  
59 can be anatomical or structural referred to as structural connectivity (SC), statistical  
60 dependencies known as functional connectivity (FC) and due to causal interaction known as  
61 effective connectivity (EC).

62         Neuroimaging techniques are widely used to estimate the brain cortical networks  
63 involved in the normal brain cognitive functions as well as in neurological diseases [1-6].  
64 Diffusion Tensor Imaging (DTI) can be adapted to estimate SC with higher capability [7-9].  
65 However, this technique is unable to estimate the dynamic connectivity among the cortical  
66 regions. The functional Magnetic Resonance Imaging (fMRI) technique is widely utilized to  
67 characterize the cortical FC [10-12] as it provides excellent spatial resolution. However fMRI  
68 has relatively lower temporal resolution [13,14] (slow sampling rate; ~1s). Hence it cannot  
69 capture the dynamic activity of the cognitive processes that have extremely short duration.  
70 These processes require excellent temporal resolution to capture the dynamic changes. Thus,  
71 Electroencephalography (EEG) can solve this problem. EEG is used to measure the scalp  
72 electrical potentials using sensor-array. EEG provides excellent temporal resolution. Hence,  
73 EEG data with suitable signal processing techniques can provide relative information regarding  
74 brain FC elicited during cognitive activities [15-18]. However, EEG suffers from low spatial  
75 resolution issue due to volume conduction [19,20]. Same underlying source may influence the  
76 EEG signals acquired from two neighbourhood sensors [21]. Thus, estimation of connectivity  
77 on EEG signals measured from scalp does not exactly convey the true neural linkages among

78 two brain areas [22]. Some approaches have been proposed to solve this issue. For example,  
79 non-linear methods like phase-locked value (PLV) [23] and imaginary coherence (IC) [24]  
80 have been proposed for FC estimation as these approaches are insensitive to volume conduction.  
81 The application of these methods on reconstructed EEG source signals provides superior spatial  
82 and temporal resolution [25-27].

83 Many algorithms have been proposed for EEG source reconstruction [28-31]. For FC  
84 estimation, several linear and non-linear methods have been developed [27,32,33]. In [34-37],  
85 some studies have discussed the application of the connectivity estimation methods on the  
86 dynamics source signals reconstructed from scalp EEG. These methods provide high efficiency  
87 for the FC estimation as the FC is directly estimated from the source space (cortex level). In  
88 this context firstly the algorithms used to perform EEG source localization by solving the ill-  
89 posed EEG inverse problem for source localization have to be implemented, followed by the  
90 FC estimation in the source space.

91 Several approaches have been proposed in the past decades in order to solve the ill-  
92 posed EEG inverse problem. For example, Minimum Norm Estimator (MNE) [38], Depth-  
93 weighted Minimum L2 Norm Estimator (wMNE) [39], Low Resolution Brain Electromagnetic  
94 Tomography (LORETA) [40], standardized Low Resolution Brain Electromagnetic  
95 Tomography (sLORETA) [41] and others. These methods are widely used to solve the ill-posed  
96 inverse problem for EEG source localization in recent researches [42-45]. As an outcome, the  
97 spatial resolution of the EEG has been improved using EEG source localization.

98 Secondly the brain FC estimation methods are categorized into linear and non-linear  
99 methods. The linear approaches include cross-correlation [46] and coherence [47], whereas  
100 non-linear methods include mutual information [48], phase synchronization [49] etc. Linear

101 and non-linear methods are widely used for FC estimations in the sensor space [50-52] as well  
102 as source space [53-56].

103 Based on the literature review it is observed that the estimated FC depends on the  
104 algorithms to solve the EEG ill-posed inverse problem and the methods for connectivity  
105 estimation. Hassan et al. reported that the use of wMNE in conjunction with the phase-locking  
106 value (PLV) provides better results as compared to the other combinations in the sensor space  
107 [26,57]. This combination has been adapted for FC analysis in the source space [25,58-60].

108 In this research, we planned to utilized wMNE to reconstruct the dipolar sources from  
109 EEG by solving the ill-posed inverse problem. Then, we applied PLV to estimate the pairwise  
110 connections between the regions-of-interest (ROIs). Time-frequency decomposition  
111 algorithms like complex Morlet Wavelet Transform (WT) and Hilbert Transform (HT) [33,61]  
112 can be adapted to transform the signals in time domain into complex time-frequency domain  
113 for instantaneous phase extraction. These two different time-frequency decomposition  
114 algorithms may have an effect on the extraction of instantaneous phases that may affect the FC  
115 estimation using PLV. In our study, we applied PLV on 148 regional time series signals to  
116 estimate the FC.

117 The estimated dipolar sources on the cortex were downsampled into 148 regions based  
118 on Destrieux atlas [62] to form regional time series. The dipolar sources within a region were  
119 grouped together into one unique source. This unique source is then used to express the cortical  
120 activity of that particular region from Destrieux atlas. Brainstorm toolbox [63] provides few  
121 options (scout functions) to perform the grouping. The scout functions are MEAN, PCA,  
122 MAX and others. MEAN averages all dipolar sources within a cortical region to produce one  
123 unique source for that particular cortical region. Using MAX, the unique source selected from  
124 the maximum sources across all the dipolar sources within that particular cortical region. And,

125 PCA takes the first mode of the PCA decomposition of all the sources within a cortical region  
126 to form a unique source of that particular region. Different regional time series can be generated  
127 using different scout functions. Thus, the scout functions can affect the extraction of  
128 instantaneous phases from regional time series signals which may affect the FC estimation  
129 using PLV.

130 Hence we believe that the network differences between two oddball cases are  
131 significant. In addition we also assume that different time-frequency decomposition algorithms  
132 and scout functions may have slightly different impact on FC estimation.

133 Based on our hypotheses, we have two main objectives. 1) To evaluate the differences  
134 in terms of functional connectivity among oddball cases in the source space. Previously the  
135 evaluation was done in the sensor space [50,51,64], 2) To assess the joint capacity of the time-  
136 frequency decomposition algorithms / scout functions applied to reconstructed EEG sources to  
137 evaluate brain FC elicited by our oddball task; as the joint capacity has not been evaluated by  
138 other studies. In this study, we also assess the impact of the scout functions and time-frequency  
139 decomposition algorithms on FC estimation.

140

## 141 **Methodology**

142 The flow chart of the research is depicted in Fig 1. Dense EEG electrode arrays was used to  
143 acquire the EEG data for visual oddball experiment. Secondly the dipolar sources were  
144 reconstructed from clean scalp EEG data using wMNE. Regional time series was computed  
145 based on Destrieux atlas using different down-sampling scout functions (PCA, MAX and  
146 MEAN). In the third step, time-frequency decomposition was carried out using Morlet WT and  
147 HT. After decomposition, regional time series in complex form in gamma band was used to

148 extract the instantaneous phases. The extracted instantaneous phases were used to estimate the  
149 FC using PLV. Proportional thresholding was applied to retain only 10% of strongest  
150 connectivity. Lastly, performance of each combination of the time-frequency decomposition  
151 algorithms with scout functions was evaluated based on the Localization index (LI) and R  
152 criterions. Statistical tests were performed to evaluate the level of significance.

153

## 154 **Experiment setup and data acquisition**

155 In an oddball paradigm, the researchers asked the participants to distinguish the novel stimuli  
156 (target) within a series of randomly displayed frequent stimuli (non-target).

157 We randomly presented the target stimuli (circle) and non-target (square) stimuli on the  
158 computer monitor for 500ms during our visual oddball paradigm [64]. The fixation time was  
159 set as 1000ms. During the fixation, an empty dark screen was presented. We requested the  
160 subjects to pay attention towards the monitor. They have to make motor response by pressing  
161 the keyboard button when the target stimuli appears on the computer monitor. When the the  
162 non-target stimuli appears; the motor response is not required. Total 135 visual stimuli were  
163 presented on the monitor. 40 out of 135 stimuli were the target stimuli, whereas 95 stimuli were  
164 the non-target stimuli. The stimuli were projected on the monitor randomly.

165 Our oddball paradigm is categorized into 4 different oddball cases. The ‘correct’ cases  
166 are target stimuli with response (TR) and non-target stimuli with no response (NTNR). While,  
167 the ‘incorrect’ cases are target stimuli with no response (TNR) and non-target stimuli with  
168 response (NTR). In TR case, the participants correctly respond to the target stimuli, whereas in  
169 TNR case the subjects fail to respond to the target stimuli. In NTR case, the subjects respond  
170 incorrectly to the non-target stimuli. In NTNR case, the participants did not provide the motor  
171 response when non-target stimuli appeared. In this study, we used TR case for the evaluation

172 of the scout functions and time-frequency decomposition algorithms. Moreover, we used TR  
173 and NTNR to compare the differences between the two cases in term of connectivity as these  
174 two cases are opposite to each other.

175 The 128-channel sensor array (HydroCel Geodesic Sensor Net) from EGI company  
176 with a sampling frequency of 250 Hz was used to acquire EEG data. The EEG data was  
177 acquired from 20 right-handed healthy participants with an age of around 19–23 years with  
178 normal or corrected-to-normal vision. None of them had a history of substance abuse and a  
179 personal or family history of psychiatric or neurological diseases.

180 The sampling frequency of the EEG acquisition system is 250 Hz. The maximum time  
181 period of the epoch is about 500ms. The data acquisition for TR case will be stopped once the  
182 subjects provided the motor response, hence the period of the epoch for this case could be less  
183 than 500 ms. The raw data was converted into Matlab format by netstation. The high frequency  
184 artifacts and DC components were removed using a finite impulse response (FIR) digital filter  
185 with a band-pass frequency range from 0.5 Hz to 70 Hz. The EEGLAB function called eegplot()  
186 was used to plot the filtered EEG data. The EEG samples that consist of artefacts induced by  
187 muscles contraction and eye blinking were manually rejected. For TR case, the clean EEG  
188 data were shifted to the right to align with the event when the button is pressed by the  
189 participants. For NTNR case, shifting is not required. The data of 2 participants was rejected.  
190 For TR and NTNR cases, three trials have been randomly selected from each subject ( $3 \times 18 =$   
191 54 trials) to perform the analysis. We performed the analysis 3 times by selecting different  
192 trials from each subject for both cases.

193



## 194 **EEG source reconstruction**

195 The generative model of EEG data,  $E(t)$  can be expressed as linear consolidation of time-  
196 varying current dipole sources  $S(t)$  with 3-dimensional (3D) orientation:

$$E(t) = L \cdot S(t) + n(t) \quad (1)$$

197 where  $n(t)$  denotes the additive noise and  $L$  denotes the lead fields matrix of the dipolar sources  
198 [26]. This process is essentially known as forward modelling. On the other hand, inverse  
199 modelling is known as the process of solving the inverse problem by reversing the step of  
200 estimating  $S(t)$  given  $E(t)$  and  $L$ .

## 201 **Forward modelling**

202 The physical process of the neuronal current propagation from brain cortical surfaces to the  
203 EEG electrodes on the scalp is described by the lead field  $L$ . The electrical conductivities and  
204 geometry of the tissues in the head are required to compute  $L$ .

205 Ideally, the geometrical model of an individual's head should be obtained from various  
206 structural MRI and digitized sensor positions. Unfortunately, taking individual MRI is costly.  
207 Thus, anatomical templates are commonly used in EEG source analysis. We utilized ICBM152  
208 template (a non-linear average of the MRI images of 152 individual's heads) for our study  
209 [65,66]. To obtain the electrical properties of the tissues in the head, we utilized boundary  
210 element method (BEM) [67]. The realistically-shaped shells that represent the brain, scalp and  
211 skull are included in BEM.

212 Based on Destrieux atlas, the cortical surface was partitioned into 148 ROIs. EEG  
213 forward modelling was done using Brainstorm toolbox. The surface meshes of the scalp, skull  
214 and brain which are realistically-shaped were extracted from the ICBM152 template. BEM was  
215 used to calculate the forward head model (lead field) from these 148 ROIs to the 129 EEG

216 channels as implemented in Open MEEG software package [68] included in Brainstorm  
217 toolbox. In this case, we set the number of vertices per layer as 1922 (default). The electrical  
218 conductivity for brain, skull and skin were set to 1 S/m, 0.0125 S/m and 1 S/m respectively.

## 219 **Inverse modelling**

220 In inverse modelling, dipolar sources are estimated over the cortical regions given the EEG  
221 signals and lead field matrices. MNE [38] imposes L2-norm constraints on the source  
222 distribution are efficient as the method is linear in the sensor data. L2-norm is introduced to  
223 regularize the problem. A weighted matrix is introduced to MNE algorithm to improve the  
224 source estimation in terms of surface sources. This method is known as wMNE [39]. The  
225 weighting matrix adjusts the properties of the solution by reducing the bias inherent to MNE  
226 algorithm. The source estimated by wMNE is expressed as

$$S_{wMNE} = (L^T W_E L + \rho I)^{-1} L^T W_E E \quad (2)$$

227 where  $W_E$  is the diagonal weighting matrix which consists of weighted factor for depth  
228 normalization,  $\rho$  denotes the regularization parameter and  $I$  is the identity matrix. The inverse  
229 estimation of sources was performed by Brainstorm toolbox. The value of  $\rho$  was set between  
230 0.1 and 0.3 [60]. After that, the dipolar sources were projected on the 3D cortical surface. The  
231 regional time series was computed based on three different scout functions offered by the  
232 Brainstorm toolbox.

233

## 234 **Time-frequency decomposition**

235 We used HT and WT to decompose the regional time series into time-frequency representation.

## 236 Hilbert Transform

237 The regional time series signals were decomposed into gamma band (30 – 60 Hz) using FIR  
238 band pass filter. After filtering, HT was applied. HT of a function  $f(t)$  can be defined as  
239 convolution of  $f(t)$  with  $1/\pi t$ . HT of a regional time series signal  $x(t)$  can be mathematically  
240 represented as:

$$y(t) = \frac{1}{\pi} (PV) \int_{-\infty}^{\infty} \frac{x(\tau)}{t - \tau} d\tau \quad (3)$$

241 where  $PV$  denotes the Cauchy principle value [69].

## 242 Wavelet Transform

243 WT outputs a time-frequency plane for regional time series signal  $x(t)$ . During spectral analysis,  
244 complex Morlet Wavelet function provides magnitude and phase information of the time series  
245 signals [70]. Mathematically, the Wavelet function is defined as follow:

$$y(t) = \pi^{-0.25} \times e^{j\omega t} \times e^{-t^2/2} \quad (4)$$

246 where  $y(t)$  is a sinusoid in complex form of  $e^{j\omega t}$  multiplied by a normalization factor ( $\pi^{-0.25}$ )  
247 and Gaussian envelope ( $e^{-t^2/2}$ ). This process is to ensure the Morlet Wavelet has unit energy.

248

## 249 Functional connectivity estimation

250 HT and WT convert the time series signal  $x(t)$  into complex function of time  $\delta(t)$  defined as:

$$\delta(t) = x(t) + jy(t) = B(t)e^{-j\phi(t)} \quad (5)$$

251 where  $\phi(t)$  denotes the instantaneous phase with respect to time and  $B(t)$  denotes the  
252 instantaneous amplitude with respect to time [69]. A MATLAB function *angle()* is used to  
253 extract the instantaneous phases of the regional time series signals in radian form.

254 The phase differences  $\theta_{ab}(t,n)$  between two regional time series signals a and b at time  
255 bins  $t$  and trial  $n$  were computed as follows:

$$\theta_{ab}(t,n) = \phi_a(t,n) - \phi_b(t,n) \quad (6)$$

256 where  $\phi_a(t,n)$  and  $\phi_b(t,n)$  are the instantaneous phase of regional time series signals a and b  
257 [71].

258 An index known as PLV was used to define the degree of synchronization between the  
259 two estimated instantaneous phases [23]. Mathematically, PLV is expressed as:

$$PLV_{ab}^S(t) = \frac{1}{N} \left| \sum_{n=1}^N e^{j\theta_{ab}(t,n)} \right| \quad (7)$$

260 where  $S$  denotes the subjects and  $N$  denotes the total number of trials. The grand average of  
261 PLV over 18 subjects  $PLV_{ab}^{GA}(t)$  is defined as

$$PLV_{ab}^{GA}(t) = \frac{1}{M} \left| \sum_{S=1}^M PLV_{ab}^S(t) \right| \quad (8)$$

262 where  $M$  denotes the total number of subjects. Adjacency matrix was formed to represent the  
263 connectivity graph. The connectivity graph was normalized with the 200 ms pre-stimulus  
264 baseline using Z-score normalization procedure. The normalized graph is then defined as

$$\text{normPLV}_{ab}^{GA}(t) = (\text{PLV}_{ab}^{GA}(t) - \mu_{ab}^{GA}) / \sigma_{ab}^{GA} \quad (9)$$

265 where  $\mu_{ab}^{GA}$  and  $\sigma_{ab}^{GA}$  are the grand-averaged mean and standard deviation calculated from the  
266 200 ms pre-stimulus baseline.

267 Next, the connectivity graph was thresholded using proportional thresholding approach  
268 [6,72]. A small percentage (10%) of strongest estimated connections were retained.

269

## 270 **Performance analysis**

271 In Destrieux atlas [62], 148 cortical regions were group into 14 macro ROIs. We predefined  
272 the 11 distinct ROIs reported to be implicated in the visual oddball paradigm based on the  
273 previously published functional imaging studies of visual oddball task [3,73-89]. The 11  
274 predefined ROIs are listed in bottom of Fig 1.

275 We performed the performance analysis using two criterions. These criterions quantify  
276 the identified networks distributed within the predefined ROIs as ‘correct’ networks whereas  
277 the identified networks distributed outside the predefined ROIs are identified as ‘incorrect’  
278 networks.

279 The first criteria is Localization Index (LI) [26]. LI is a ‘global’ indicator to quantify  
280 the performance of the scout functions/time-frequency decomposition algorithms pair. It was  
281 computed over the 11 predefined ROIs. LI is defined as the ratio between the number of  
282 identified edges within all predefined ROIs and the total number of estimated edges.  
283 Mathematically, LI is defined as

$$LI = \frac{NET_{\varepsilon}}{NET_{\varepsilon} + NET'_{\varepsilon}} \quad (10)$$

284 where  $NET_{\varepsilon}$  denotes the number of estimated connections within the 11 predefined ROIs and  
285  $NET'_{\varepsilon}$  denotes the quantity of estimated edges outside the predefined ROIs. The LI ranges  
286 between 0 (no connections are identified with the predefined ROIs) and 1 (all connections are  
287 identified within the predefined ROIs).

288 Another criteria used for performance analysis is R [26], known as the ‘local’ indicator  
289 to quantify the local distribution of identified networks within each ROI. Ratio between  
290 quantity of estimated connections within each predefined ROI and total identified connections  
291 within all predefined ROIs. Mathematically, the R can be expressed as:

$$R_i = \frac{NET_{ROI}^i}{NET_{\varepsilon}} \quad (11)$$

292 where  $i$  denotes the 11 predefined ROIs (see Fig 1) and  $NET_{ROI}^i$  denotes the number of  
293 estimated connections within the ROI  $i$ . The  $R_i$  criteria ranges from 0 (no estimated edges are  
294 found inside ROI  $i$ ) to 1 (all estimated edges are found inside ROI  $i$ ).

295

## 296 **Results and discussion**

297 In this study, we have performed source localization of EEG data acquired during visual  
298 oddball task. We used wMNE algorithm to solve the EEG inverse problem. Fig 2A depicts the  
299 estimated current density sources on 3-dimensional (3D) cortex between 240 – 500 ms of the  
300 epoch. From the top view of the cortex, it is observed that the majority of current sources are  
301 intensively distributed on the parietal and central regions. These activations are generally  
302 elicited by P300 and motor response. The bottom, left and right views show stronger current  
303 sources over the left temporal region. On the front view, peak current sources are mainly

304 distributed on the frontal region. On the back view, lower intensity of current sources are  
305 observed over occipital region.

306 We partitioned the cortical surface of the brain into 148 regions based on Destrieux  
307 cortical atlas. These regions are equally parcelled over right and left hemispheres of the brain  
308 surface. These regions are also known as scouts in Brainstorm jargon. We applied several scout  
309 functions, i.e. MEAN, MAX and PCA, as source down-sampling algorithm to create the scout  
310 (regional) time series (148 regions from Destrieux atlas). Fig 2B - 2D depicts the regional time  
311 series projected on 3D cortex between 240 – 500 ms. As we can see on the figure, the regional  
312 times series generated by different scout functions are different in terms of current density  
313 distribution and intensity. Therefore, scout functions could be a factor that affecting the  
314 performance of FC estimation.

315 We applied WT and HT to decompose the regional time series signals into time-  
316 frequency domain. Fig 3 depicts the time-frequency representations of a regional time series  
317 (right central region). The peak magnitude in gamma band (30 – 60 Hz) was observed over  
318 both spectrograms which is elicited by motor planning and integration. However, both  
319 algorithms show different intensity in gamma band as well as in other bands. Therefore, time-  
320 frequency decomposition algorithms could be another factor that affects the performance of  
321 FC estimation.

322 We extracted the instantaneous phase of the regional time series in gamma band using  
323 PLV to estimate the FC. The connectivity graphs obtained for the 6 different combinations of  
324 the time-frequency decomposition algorithms and scout functions are presented in Fig 4. The  
325 colour-coded circles are the nodes of the network while the lines linking the two nodes are  
326 denoted as an edge. The colours of the nodes show the intensity level of the node degree. The  
327 main purpose of the node degree here is to use as a comparative parameter to distinguish the

328 identified networks estimated by different combinations of methodologies. Indeed, the  
329 differences can be observed based on the edges. For qualitative visual inspection of the  
330 estimated networks, the node degree is compulsory for the comparisons between the estimated  
331 networks. The qualitative visual inspection of the estimated edges indicate that the results are  
332 highly dependent on the two factors, i.e. time-frequency decomposition algorithms and scout  
333 functions.

334 The performance analysis was carried out on TR case using **criterion LI** to quantify  
335 the results shown in Fig 4. In this performance analysis, mean values of LI and their  
336 corresponding standard deviations were used to quantify the efficiency (depends on LI values)  
337 and consistency (depends on standard deviation values), respectively, of the scout functions  
338 and time-frequency decomposition algorithms. We conducted three analyses in TR case using  
339 different trial selections to evaluate the consistency of the methods based on the obtained  
340 results. Fig 5 depicts the mean values of the criterion LI on TR case for different scout functions  
341 (MEAN, MAX and PCA) and time-frequency decomposition algorithms (WT and HT). We  
342 performed the Pearson's correlation analysis to describe the interplays between the variability  
343 of each factor and the different factors/combinations. We noted that the combinations with  
344 same scout function have lower correlation values (0.194 for Wavelet/PCA vs. Hilbert/PCA  
345 and Wavelet/MAX vs. Hilbert/MAX) than the combinations with same time-frequency  
346 decomposition algorithms (0.979 for Hilbert/PCA vs. Hilbert/MAX and 0.986 for  
347 Wavelet/PCA vs. Wavelet/MAX). The correlation values show that time-frequency  
348 decomposition algorithms have higher variability and therefore, the time-frequency  
349 decomposition algorithms strongly impact the LI values as compared to the scout functions.

350 As observed, regardless of scout functions, HT yields slightly higher mean LI values  
351 than WT. Theoretically, HT yields slightly higher efficiency than WT based on the connectivity  
352 estimation over expected ROIs (based on literatures) using PLV. However, as we can observe,



353 the difference between these two time-frequency decomposition algorithms in term of LI are  
354 minor (0.01 in PCA; 0.007 in MAX; 0.003 in MEAN). We performed Student's t-test. The  
355 results show no significant difference between WT and HT in scout functions of PCA, MAX  
356 and MEAN. Application of both algorithms produces similar results with minor difference  
357 [69,90,91]. Therefore, we can conclude that application of both algorithms on connectivity  
358 estimation using PLV is efficient as the result shows that PLV is able to localize more than  
359 80% of significant connections using both algorithms to extract the instantaneous phases of the  
360 regional time series. However, in terms of consistency, WT is better. Based on the results, we  
361 observe that WT is more consistent in extracting instantaneous phases for connectivity  
362 estimation as the standard deviation values are lower. As mentioned earlier, we conducted the  
363 analysis three times on same methodology by different trial selections in TR case. The standard  
364 deviation represents the fluctuations or more precisely, variability of the factors across different  
365 selected trials on the same case. In this situation, WT is more consistent than HT across the  
366 different trials. Therefore, we conclude that WT performed better in instantaneous phase  
367 extractions for connectivity estimation for visual oddball paradigm.

368 Hence time-frequency decomposition algorithms have stronger effect on mean LI  
369 values, whereas scout functions have minor impact on the mean LI values. Combinations of  
370 scout functions (PCA, MAX, and MEAN) with same time-frequency decomposition algorithm  
371 (HT) provide the higher mean LI value. The result indicates that these combinations have  
372 higher efficiency in connectivity estimation over expected ROIs using PLV. Among these  
373 combinations, MAX with HT provides highest averaged LI value (LI=0.843). However, some  
374 minor differences are observed among these combinations. According to the results of the  
375 Student's t-test, these minor differences are insignificant. Hence, in term of efficiency, PCA,  
376 MAX and MEAN with HT provides similar results with minor differences. Nevertheless, in  
377 term of consistency, MAX/HT is better as the standard deviation is smaller among these three

378 combinations. Therefore, the application of HT in conjunction with scout function MAX yields  
379 better outcome than the other two combinations.

380 On the other hand, combinations of WT with three scout functions produce lower mean  
381 LI values than combinations of HT with the three scout functions. In these three combinations,  
382 WT/MEAN gives higher mean LI value than others. However, the differences are still minor.  
383 Thus, we performed Student's t-test. The results demonstrate that WT/PCA and WT/MEAN  
384 pairs are significantly different ( $p < 0.05$ ). WT/MEAN pair provides higher efficiency in  
385 connectivity estimation. However, in terms of consistency, WT/PCA pair is better.

386 Hence we can conclude that WT is better than HT in terms of consistency of the results  
387 [92]. WT with MEAN scout function gives higher efficiency in connectivity estimation.  
388 However, WT with PCA pair has better consistency than other combinations.

389 Now we discuss the outcomes obtained from the quantitative comparison of the  
390 performance of the time-frequency decomposition algorithms and scout functions on FC  
391 estimation, based on the **R criterion**. The R criterion is known as a 'local' indicator. The R  
392 values reflect the distribution of estimated links in each predefined ROI obtained from literature.  
393 R is known to be important as the brain regions activated during the visual oddball paradigm  
394 (consists of P300 and motor response) are supposed to be distinct. Moreover, the estimated  
395 network is known to be dependent on the time-frequency decomposition algorithms and scout  
396 functions.

397 In Fig 6, the straight line curves of the R values obtained for the two time-frequency  
398 decomposition algorithms are superimposed and plotted for each scout function. Results  
399 indicate that all signal processing algorithms identified a comparable percentage of significant  
400 connections for all scout functions. As shown in Fig 6 the SD values of WT/Scout functions is  
401 mostly lower than the HT/Scout functions. Only few SD values in WT/MAX and WT/MEAN

402 pairs are slightly higher. (For examples: LF, LT and RT in WT/MAX pair; LF, LC, LT, RT  
403 and LP in WT/MEAN pair). However, the WT is still considered as a consistent algorithm to  
404 extract instantaneous phases for. This result is correlated with the result in the preceding part  
405 for LI calculation.

406 Student's t test was carried out to statistically compare the differences between different  
407 factors (WT/PCA vs. HT/PCA; WT/MAX vs. HT/MAX; WT/MEAN vs. HT/MEAN) in 4  
408 different ROIs (LC; RC; LP; RP) to identify the significant pairs of factors with higher  
409 efficiency. These 4 ROIs are significant in oddball tasks [93-96]. Neural activity in LP and RP  
410 corresponds to P300 (decision making) while neural activity in LC and RC corresponds to  
411 motor planning and integration.

412 As shown in Fig 6, combinations of WT with 3 scout functions yield higher averaged  
413 R values as compared to combinations of HT with 3 scout functions. WT/PCA pair yields  
414 higher average R values on the 4 ROIs than HT/PCA pair. Results indicate no significant  
415 differences between the combinations in LC, RC and LP. However, a significant difference is  
416 observed in RP ( $p=0.023$ ). On the other hand, as depicted in Fig 6, Wavelet/MAX gives higher  
417 average R values than Hilbert/MAX as well over the ROIs of LC, RC, LP and RP. The  
418 differences are still minor between these two combinations. Statistical outcomes demonstrate  
419 that no significant differences are observed on these two pairs of factors. Lastly, we applied  
420 Student's t test on the combinations of WT/ MEAN and HT/MEAN. Results reveal that the  
421 differences are not between the combinations in LC, RC and RP. However, a significant  
422 difference is observed in LP ( $p=0.021$ ).

423 Based on the statistical results, we note that WT/PCA pair yields greater R value than  
424 Hilbert/PCA over parietal region (RP) and the difference is significant. Moreover, WT/MEAN  
425 pair yields greater R value than Hilbert/MEAN over parietal region (LP) as well and the

426 difference is significant. According to other researches, activity over parietal region is  
427 essentially elicited by P300 response which is a significant oddball event [97,98]. Thus, we  
428 believe that WT/PCA and WT/MEAN pairs provide good performance for PLV to localize the  
429 connectivity triggered by P300 response.

430 By combining the analysis from LI and R, we can say that WT is more consistent than  
431 HT. Moreover, we also realized that WT/PCA and WT/MEAN pairs have high performance.  
432 Hence the results of Wavelet/PCA pair is more consistent. Besides that, PLV also was able to  
433 localize more than 80% of networks (LI=0.831) using WT/PCA pair. The efficiency of this  
434 pair is acceptable and the consistency of this pair is better. Therefore, we conclude that  
435 WT/PCA is adequate and a good choice for visual Oddball task.

436 We performed the comparisons between TR and NTNR cases in order to validate the  
437 performance of the WT/PCA pair based on LI and R criterions. Moreover, we would like to  
438 analyse the differences of TR versus NTNR in terms of FC using R criterion.

439 Fig 7 shows the distribution of the estimated brain functional networks on cortical  
440 surface for TR and NTNR cases. As illustrated, the difference in terms of estimated  
441 connectivity among both cases is obvious. Consequently, target and non-target stimuli elicited  
442 different brain networks during oddball task. As depicted in Fig 7, the difference in the  
443 estimated networks is illustrated on the cortical surface. Furthermore, the quantitative analysis  
444 is required to evaluate the difference is done using LI and R parameters.

445 Fig 8 shows the mean LI value of WT/PCA for TR and NTNR cases. It is observed that  
446 the PLV is able to localize denser networks over the predefined ROIs in TR case which are  
447 significant for visual oddball event including P300, motor response and others elicited by target  
448 stimuli. In our case, we observe that TR case has greater LI than NTNR case. In other words,  
449 target stimuli triggered higher brain connectivity. We performed statistical test (ANOVA) to

450 evaluate the difference between these two cases. The TR case is significantly different ( $p=0.002$ )  
451 from NTNR case in terms of average LI values. Thus, we conclude that TR case triggered  
452 denser networks as compared to NTNR case [50,99]. Moreover, WT/PCA is sufficient for PLV  
453 to use as a connectivity estimation modality for visual oddball paradigm.

454 So far, we compared the difference between TR and NTNR case using ‘global’  
455 indicator. Now, we will analyse the differences between TR and NTNR cases within ROIs  
456 using ‘local’ indicator, criterion R. The comparisons of R values between two cases were  
457 plotted on a line graph shown in Fig 9. As seen the major differences between TR and NTNR  
458 cases are observed within majority of ROIs especially LL, RL, LC, RC, LP, RP and LT. TR  
459 case has denser cortical connectivity within these ROIs than NTNR case. ANOVA tests were  
460 carried out for each ROI to statistically compare the difference between both cases within each  
461 ROI.

462 For ROIs in limbic (LL & RL) regions, target stimuli elicited greater cortical activity.  
463 Based on ANOVA the TR case is significantly different than NTNR case for R values within  
464 LL and RL ( $p=0.028$  &  $p=0.002$  respectively). According to Destrieux atlas, Cingulate cortices  
465 (Cingulate gyrus and sulcus) are included in the limbic regions. Our result show that target  
466 stimuli elicited denser networks over bilateral limbic regions than non-target stimuli which is  
467 in line with other researches [86,100,101]. These cortical activities are mostly related to P300  
468 response (decision making for the response to target stimuli) [102-105] as well as target stimuli  
469 detection [106]. Therefore, TR case is different with NTNR case in terms of the estimated  
470 network over limbic regions as the target detection process and P300 response are present in  
471 TR case, but absent in NTNR and the difference is significant.

472 For ROIs in central (LC & RC) regions, the difference between TR and NTNR cases in  
473 terms of R is obvious. Greater central cortical activity is observed in TR case than in NTNR.

474 Results of the statistical test shows that TR case is different from NTNR case in terms of the  
475 corresponding R values within these two ROIs and the differences are significant (LC:  $p=0.05$ ;  
476 RC:  $p=0.03$ ). According to our oddball paradigm, instead of non-target stimuli, the subjects  
477 provided motor response to the target stimuli. Thus, higher cortical activity is found over  
478 central regions in TR case than NTNR case. Our result is correlated with other studies  
479 [76,100,105,107-110]. Therefore, TR case is significantly different from NTNR in terms of  
480 cortical network over central regions.

481 For ROI in right temporal (RT) lobe, superior temporal activity is observed in TR case.  
482 ANOVA test indicates that the difference between TR and NTNR cases in terms of R values  
483 are significant ( $p=0.036$ ) within this ROI. Some studies reported that cortical connectivity  
484 distributed over temporal regions corresponds to visual target detection [111] and P300  
485 response [102,112,113]. Moreover, in [103,114], the authors reported that right temporal region  
486 is more dominant than left temporal during P300 response. Hence, TR case is different from  
487 NTNR case in terms of the connectivity over right temporal region for P300 response.

488 Lastly, in parietal (LP & RP) regions, higher parietal activity is noticed in TR case. The  
489 results of statistical tests denote that both cases are significantly distinct with each other in LP  
490 ( $p=0.049$ ) and RP ( $p=0.007$ ) in terms of their designated R values. Denser bilateral cortical  
491 activity is observed over parietal regions in TR case that corresponds to P300 response  
492 [105,115-118] and motor coordination for button pressing [76,119,120]. Thus, NTNR case has  
493 lower bilateral parietal activity as no P300 and motor responses are required for non-target  
494 stimuli.

495

## 496 **Conclusion**

497 In this study our aim is to observe the FC for visual oddball task using the source space. We  
498 used wMNE method to reconstruct the sources for data acquired by EEG for visual oddball  
499 task. We applied three different scout functions (MEAN, MAX and PCA) to generate the  
500 regional time series signals. We applied two time-frequency decomposition algorithms (HT  
501 and WT) to represent the regional time series signals into complex functions. We extracted  
502 instantaneous phases from the complex form of regional time series signals and estimated the  
503 FC using PLV. The connectivity graphs were proportionally thresholded to retain 10% of  
504 strongest networks. We evaluated the performance of the scout functions/time-frequency  
505 decomposition algorithms pairs based on LI and R. Lastly, we compared the differences  
506 between TR and NTNR cases based on the LI and R.

507 Our results demonstrate that time-frequency decomposition algorithms have higher  
508 impact on the LI values than the scout functions. In addition, WT is better than HT in terms of  
509 the consistency of LI. All pairs show good efficiency in connectivity estimation as all pairs  
510 yield more than 80% of LI. However, WT/PCA pair is more consistent than others. Moreover,  
511 WT/PCA is capable to estimate the connectivity within parietal region which corresponds to  
512 P300 response. Lastly, we observe the differences in connectivity between TR and NTNR cases  
513 over parietal, central, right temporal and limbic regions which correspond to target detection,  
514 P300 response and motor response.

515 In conclusion, the outcome of the connectivity estimation might be affected by scout  
516 functions/time-frequency algorithm pairs. Consequently, WT/PCA is the best choice for visual  
517 oddball task as the scout function to generate regional time series signals and time-frequency  
518 decomposition algorithms to transform the signals into gamma band for instantaneous phase

519 extraction. The TR and NTNR cases are different in terms of FC. Greater R values are observed  
520 over the regions which correspond to P300 and motor response.

521 The performance of the combinations of scout functions/time-frequency decomposition  
522 algorithms have not been evaluated so far in the literature. We found that the WT/PCA is best  
523 for visual oddball task. We believe that PCA is superior for generation of regional time series  
524 signals and WT is superior for time-frequency decomposition for extraction of instantaneous  
525 phases. On the other hand, we found that higher connectivity over parietal, temporal, central  
526 region and limbic regions are significant for P300 response. Thus, we believe that this  
527 discovery of P300 response could be used as an electrophysiological marker to distinguish the  
528 healthy individuals and the subjects with mild cognitive impairment diseases as well as the  
529 marker for the diagnosis and prediction of mild cognitive impairment disorders [96,121-123].

530

## 531 **References**

- 532 1. Beaty RE, Chen Q, Christensen AP, Qiu J, Silvia PJ, Schacter DL. Brain networks of the imaginative  
533 mind: Dynamic functional connectivity of default and cognitive control networks relates to openness to  
534 experience. *Hum Brain Mapp.* 2018;39(2):811–21.
- 535 2. Giraldo-Chica M, Rogers BP, Damon SM, Landman BA, Woodward ND. Prefrontal-thalamic  
536 anatomical connectivity and executive cognitive function in schizophrenia. *Biol Psychiatry.*  
537 2018;83(6):509–17.
- 538 3. Cléry H, Andersson F, Fonlupt P, Gomot M. Brain correlates of automatic visual change detection.  
539 *Neuroimage.* 2013;75:117–22.
- 540 4. Fornito A, Yoon J, Zalesky A, Bullmore ET, Carter CS. General and specific functional connectivity  
541 disturbances in first-episode schizophrenia during cognitive control performance. *Biol Psychiatry.*  
542 2011;70(1):64–72.
- 543 5. Lynall M-E, Bassett DS, Kerwin R, McKenna PJ, Kitzbichler M, Muller U, et al. Functional



- 544 connectivity and brain networks in schizophrenia. *J Neurosci*. 2010;30(28):9477–87.
- 545 6. Van Den Heuvel MP, Pol HEH. Exploring the brain network: a review on resting-state fMRI functional  
546 connectivity. *Eur Neuropsychopharmacol*. 2010;20(8):519–34.
- 547 7. Englander ZA, Sun J, Case L, Mikati MA, Kurtzberg J, Song AW. Brain structural connectivity  
548 increases concurrent with functional improvement: evidence from diffusion tensor MRI in children with  
549 cerebral palsy during therapy. *NeuroImage Clin*. 2015;7:315–24.
- 550 8. Sitek KR, Cai S, Beal DS, Perkell JS, Guenther FH, Ghosh SS. Decreased cerebellar-orbitofrontal  
551 connectivity correlates with stuttering severity: whole-brain functional and structural connectivity  
552 associations with persistent developmental stuttering. *Front Hum Neurosci*. 2016;10:190.
- 553 9. Ewert S, Plettig P, Li N, Chakravarty MM, Collins DL, Herrington TM, et al. Toward defining deep  
554 brain stimulation targets in MNI space: a subcortical atlas based on multimodal MRI, histology and  
555 structural connectivity. *Neuroimage*. 2018;170:271–82.
- 556 10. Mueller F, Musso F, London M, de Boer P, Zacharias N, Winterer G. Pharmacological fMRI: Effects of  
557 subanesthetic ketamine on resting-state functional connectivity in the default mode network, salience  
558 network, dorsal attention network and executive control network. *NeuroImage Clin*. 2018;19:745–57.
- 559 11. Hindriks R, Adhikari MH, Murayama Y, Ganzetti M, Mantini D, Logothetis NK, et al. Can sliding-  
560 window correlations reveal dynamic functional connectivity in resting-state fMRI? *Neuroimage*.  
561 2016;127:242–56.
- 562 12. Zhang S, Chiang-shan RL. Functional connectivity mapping of the human precuneus by resting state  
563 fMRI. *Neuroimage*. 2012;59(4):3548–62.
- 564 13. Tagliazucchi E, Laufs H. Multimodal imaging of dynamic functional connectivity. *Front Neurol*.  
565 2015;6:10.
- 566 14. Vitali P, Di Perri C, Vaudano AE, Meletti S, Villani F. Integration of multimodal neuroimaging  
567 methods: a rationale for clinical applications of simultaneous EEG-fMRI. *Funct Neurol*. 2015;30(1):9.
- 568 15. Coito A, Michel CM, van Mierlo P, Vulliémoz S, Plomp G. Directed functional brain connectivity  
569 based on EEG source imaging: methodology and application to temporal lobe epilepsy. *IEEE Trans*  
570 *Biomed Eng*. 2016;63(12):2619–28.

- 571 16. Mheich A, Hassan M, Dufor O, Khalil M, Berrou C, Wendling F. Spatiotemporal analysis of brain  
572 functional connectivity. In: 6th European Conference of the International Federation for Medical and  
573 Biological Engineering. 2015. p. 934–7.
- 574 17. Sakkalis V. Review of advanced techniques for the estimation of brain connectivity measured with  
575 EEG/MEG. *Comput Biol Med.* 2011;41(12):1110–7.
- 576 18. David O, Cosmelli D, Hasboun D, Garnero L. A multitrial analysis for revealing significant  
577 corticocortical networks in magnetoencephalography and electroencephalography. *Neuroimage.*  
578 2003;20(1):186–201.
- 579 19. Somon B, Campagne A, Delorme A, Berberian B. Evaluation of performance monitoring ERPs through  
580 difficulty manipulation in a response-feedback paradigm. *Brain Res.* 2019;1704:196–206.
- 581 20. Burle B, Spieser L, Roger C, Casini L, Hasbroucq T, Vidal F. Spatial and temporal resolutions of EEG:  
582 Is it really black and white? A scalp current density view. *Int J Psychophysiol.* 2015;97(3):210–20.
- 583 21. Hashiguchi K, Morioka T, Yoshida F, Miyagi Y, Nagata S, Sakata A, et al. Correlation between scalp-  
584 recorded electroencephalographic and electrocorticographic activities during ictal period. *Seizure.*  
585 2007;16(3):238–47.
- 586 22. Stam CJ van, Van Straaten ECW. The organization of physiological brain networks. *Clin Neurophysiol.*  
587 2012;123(6):1067–87.
- 588 23. Lachaux J-P, Rodriguez E, Martinerie J, Varela FJ, others. Measuring phase synchrony in brain signals.  
589 *Hum Brain Mapp.* 1999;8(4):194–208.
- 590 24. Nolte G, Bai O, Wheaton L, Mari Z, Vorbach S, Hallett M. Identifying true brain interaction from EEG  
591 data using the imaginary part of coherency. *Clin Neurophysiol.* 2004;115(10):2292–307.
- 592 25. Bola Michałand Sabel BA. Dynamic reorganization of brain functional networks during cognition.  
593 *Neuroimage.* 2015;114:398–413.
- 594 26. Hassan M, Dufor O, Merlet I, Berrou C, Wendling F. EEG source connectivity analysis: from dense  
595 array recordings to brain networks. *PLoS One.* 2014;9(8):e105041.
- 596 27. Schoffelen J-M, Gross J. Source connectivity analysis with MEG and EEG. *Hum Brain Mapp.*  
597 2009;30(6):1857–65.

- 598 28. Bradley A, Yao J, Dewald J, Richter C-P. Evaluation of electroencephalography source localization  
599 algorithms with multiple cortical sources. *PLoS One*. 2016;11(1):e0147266.
- 600 29. Becker H, Albera L, Comon P, Haardt M, Birot G, Wendling F, et al. EEG extended source localization:  
601 tensor-based vs. conventional methods. *Neuroimage*. 2014;96:143–57.
- 602 30. Jatoi MA, Kamel N, Malik AS, Faye I, Begum T. A survey of methods used for source localization  
603 using EEG signals. *Biomed Signal Process Control*. 2014;11:42–52.
- 604 31. Kaiboriboon K, Lüders HO, Hamaneh M, Turnbull J, Lhatoo SD. EEG source imaging in epilepsy—  
605 practicalities and pitfalls. *Nat Rev Neurol*. 2012;8(9):498.
- 606 32. Bastos AM, Schoffelen J-M. A tutorial review of functional connectivity analysis methods and their  
607 interpretational pitfalls. *Front Syst Neurosci*. 2016;9:175.
- 608 33. Greenblatt RE, Pflieger ME, Ossadtchi AE. Connectivity measures applied to human brain  
609 electrophysiological data. *J Neurosci Methods*. 2012;207(1):1–16.
- 610 34. Li F, Yi C, Jiang Y, Liao Y, Si Y, Yao D, et al. The Construction of Large-Scale Cortical Networks for  
611 P300 From Scalp EEG. *IEEE Access*. 2018;6:68498–506.
- 612 35. Liu Q, Ganzetti M, Wenderoth N, Mantini D. Detecting large-scale brain networks using EEG: impact  
613 of electrode density, head modeling and source localization. *Front Neuroinform*. 2018;12:4.
- 614 36. Supp GG, Schlögl A, Trujillo-Barreto N, Müller MM, Gruber T. Directed cortical information flow  
615 during human object recognition: analyzing induced EEG gamma-band responses in brain's source  
616 space. *PLoS One*. 2007;2(8):e684.
- 617 37. Astolfi L, Cincotti F, Mattia D, Babiloni C, Carducci F, Basilisco A, et al. Assessing cortical functional  
618 connectivity by linear inverse estimation and directed transfer function: simulations and application to  
619 real data. *Clin Neurophysiol*. 2005;116(4):920–32.
- 620 38. Hämäläinen MS, Ilmoniemi RJ. Interpreting magnetic fields of the brain: minimum norm estimates.  
621 *Med Biol Eng Comput*. 1994;32(1):35–42.
- 622 39. Lin F-H, Witzel T, Ahlfors SP, Stufflebeam SM, Belliveau JW, Hämäläinen MS. Assessing and  
623 improving the spatial accuracy in MEG source localization by depth-weighted minimum-norm  
624 estimates. *Neuroimage*. 2006;31(1):160–71.

- 625 40. Pascual-Marqui RD, Michel CM, Lehmann D. Low resolution electromagnetic tomography: a new  
626 method for localizing electrical activity in the brain. *Int J Psychophysiol.* 1994;18(1):49–65.
- 627 41. Pascual-Marqui RD, others. Standardized low-resolution brain electromagnetic tomography  
628 (sLORETA): technical details. *Methods Find Exp Clin Pharmacol.* 2002;24(Suppl D):5–12.
- 629 42. López ME, Pusil S, Pereda E, Maestú F, Barceló F. Dynamic low frequency EEG phase synchronization  
630 patterns during proactive control of task switching. *Neuroimage.* 2019;186:70–82.
- 631 43. Kiat JE. Assessing cross-modal target transition effects with a visual-auditory oddball. *Int J*  
632 *Psychophysiol.* 2018;129:58–66.
- 633 44. Molina V, Bachiller A, de Luis R, Lubeiro A, Poza J, Hornero R, et al. Topography of activation deficits  
634 in schizophrenia during P300 task related to cognition and structural connectivity. *Eur Arch Psychiatry*  
635 *Clin Neurosci.* 2018;1–10.
- 636 45. Shim M, Kim D-W, Lee S-H, Im C-H. Disruptions in small-world cortical functional connectivity  
637 network during an auditory oddball paradigm task in patients with schizophrenia. *Schizophr Res.*  
638 2014;156(2–3):197–203.
- 639 46. Brazier MAB, Casby JU. Crosscorrelation and autocorrelation studies of electroencephalographic  
640 potentials. *Electroencephalogr Clin Neurophysiol.* 1952;4(2):201–11.
- 641 47. Brazier MAB. Studies of the EEG activity of limbic structures in man. *Electroencephalogr Clin*  
642 *Neurophysiol.* 1968;25(4):309–18.
- 643 48. Mars NJ, da Silva Lopes FH. Propagation of seizure activity in kindled dogs. *Electroencephalogr Clin*  
644 *Neurophysiol.* 1983;56(2):194–209.
- 645 49. Rosenblum M, Pikovsky A, Kurths J, Schäfer C, Tass PA. Phase synchronization: from theory to data  
646 analysis. In: *Handbook of biological physics.* Elsevier; 2001. p. 279–321.
- 647 50. Thee KW, Nisar H, Soh CS. Graph Theoretical Analysis of Functional Brain Networks in Healthy  
648 Subjects: Visual Oddball Paradigm. *IEEE Access.* 2018;6:64708–27.
- 649 51. Lim SH, Nisar H, Yap VV, Shim S-O. Tracking of electroencephalography signals across brain lobes  
650 using motion estimation and cross-correlation. *J Electron Imaging.* 2015;24(6):61106.

- 651 52. Mheich A, Hassan M, Khalil M, Berrou C, Wendling F. A new algorithm for spatiotemporal analysis of  
652 brain functional connectivity. *J Neurosci Methods*. 2015;242:77–81.
- 653 53. Wang SH, Lobier M, Siebenhühner F, Puoliväli T, Palva S, Palva JM. Hyperedge bundling: A practical  
654 solution to spurious interactions in MEG/EEG source connectivity analyses. *Neuroimage*.  
655 2018;173:610–22.
- 656 54. Cohen MX, Ridderinkhof KR. EEG source reconstruction reveals frontal-parietal dynamics of spatial  
657 conflict processing. *PLoS One*. 2013;8(2):e57293.
- 658 55. Hillebrand A, Barnes GR, Bosboom JL, Berendse HW, Stam CJ. Frequency-dependent functional  
659 connectivity within resting-state networks: an atlas-based MEG beamformer solution. *Neuroimage*.  
660 2012;59(4):3909–21.
- 661 56. Lehmann D, Faber PL, Tei S, Pascual-Marqui RD, Milz P, Kochi K. Reduced functional connectivity  
662 between cortical sources in five meditation traditions detected with lagged coherence using EEG  
663 tomography. *Neuroimage*. 2012;60(2):1574–86.
- 664 57. Hassan M, Merlet I, Mheich A, Kabbara A, Biraben A, Nica A, et al. Identification of interictal epileptic  
665 networks from dense-EEG. *Brain Topogr*. 2017;30(1):60–76.
- 666 58. Lai M, Demuru M, Hillebrand A, Fraschini M. A comparison between scalp-and source-reconstructed  
667 EEG networks. *Sci Rep*. 2018;8(1):12269.
- 668 59. Kabbara A, Falou WEL, Khalil M, Wendling F, Hassan M. The dynamic functional core network of the  
669 human brain at rest. *Sci Rep*. 2017;7(1):2936.
- 670 60. Hassan M, Benquet P, Biraben A, Berrou C, Dufor O, Wendling F. Dynamic reorganization of  
671 functional brain networks during picture naming. *Cortex*. 2015;73:276–88.
- 672 61. Aviyente S, Tootell A, Bernat EM. Time-frequency phase-synchrony approaches with ERPs. *Int J*  
673 *Psychophysiol*. 2017;111:88–97.
- 674 62. Destrieux C, Fischl B, Dale A, Halgren E. Automatic parcellation of human cortical gyri and sulci using  
675 standard anatomical nomenclature. *Neuroimage*. 2010;53(1):1–15.
- 676 63. Tadel F, Baillet S, Mosher JC, Pantazis D, Leahy RM. Brainstorm: a user-friendly application for  
677 MEG/EEG analysis. *Comput Intell Neurosci*. 2011;2011:8.

- 678 64. Lim SH, Nisar H, Thee KW, Yap VV. A novel method for tracking and analysis of EEG activation  
679 across brain lobes. *Biomed Signal Process Control*. 2018;40:488–504.
- 680 65. Fonov V, Evans AC, Botteron K, Almli CR, McKinstry RC, Collins DL, et al. Unbiased average age-  
681 appropriate atlases for pediatric studies. *Neuroimage*. 2011;54(1):313–27.
- 682 66. Mazziotta JC, Toga AW, Evans A, Fox P, Lancaster J, others. A probabilistic atlas of the human brain:  
683 theory and rationale for its development. *Neuroimage*. 1995;2(2):89–101.
- 684 67. Mosher JC, Leahy RM, Lewis PS. EEG and MEG: forward solutions for inverse methods. *IEEE Trans*  
685 *Biomed Eng*. 1999;46(3):245–59.
- 686 68. Gramfort A, Papadopoulo T, Olivi E, Clerc M. OpenMEEG: opensource software for quasistatic  
687 bioelectromagnetics. *Biomed Eng Online*. 2010;9(1):45.
- 688 69. Le Van Quyen M, Foucher J, Lachaux J-P, Rodriguez E, Lutz A, Martinerie J, et al. Comparison of  
689 Hilbert transform and wavelet methods for the analysis of neuronal synchrony. *J Neurosci Methods*.  
690 2001;111(2):83–98.
- 691 70. Qassim YT, Cutmore TRH, James DA, Rowlands DD. Wavelet coherence of EEG signals for a visual  
692 oddball task. *Comput Biol Med*. 2013;43(1):23–31.
- 693 71. Thee KW, Nisar H. Comparison of Brain Functional Networks for Subjects with Different Performance.  
694 In: 2018 IEEE Region 10 Humanitarian Technology Conference (R10-HTC). 2018. p. 1–6.
- 695 72. Sporns O. Structure and function of complex brain networks. *Dialogues Clin Neurosci*. 2013;15(3):247.
- 696 73. Fajkus J, Mikl M, Shaw DJ, Brázdil M. An fMRI investigation into the effect of preceding stimuli  
697 during visual oddball tasks. *J Neurosci Methods*. 2015;251:56–61.
- 698 74. Kim YY, Jung YS. Reduced frontal activity during response inhibition in individuals with psychopathic  
699 traits: An sLORETA study. *Biol Psychol*. 2014;97:49–59.
- 700 75. Machado S, Arias-Carrión O, Sampaio I, Bittencourt J, Velasques B, Teixeira S, et al. Source imaging  
701 of P300 visual evoked potentials and cognitive functions in healthy subjects. *Clin EEG Neurosci*.  
702 2014;45(4):262–8.
- 703 76. Walz JM, Goldman RI, Carapezza M, Muraskin J, Brown TR, Sajda P. Simultaneous EEG–fMRI

- 704 reveals a temporal cascade of task-related and default-mode activations during a simple target detection  
705 task. *Neuroimage*. 2014;102:229–39.
- 706 77. Akimoto Y, Kanno A, Kambara T, Nozawa T, Sugiura M, Okumura E, et al. Spatiotemporal dynamics  
707 of high-gamma activities during a 3-stimulus visual oddball task. *PLoS One*. 2013;8(3):e59969.
- 708 78. Warbrick T, Reske M, Shah NJ. Do EEG paradigms work in fMRI? Varying task demands in the visual  
709 oddball paradigm: Implications for task design and results interpretation. *Neuroimage*. 2013;77:177–85.
- 710 79. Warbrick T, Mobascher A, Brinkmeyer J, Musso F, Stoecker T, Shah NJ, et al. Nicotine effects on brain  
711 function during a visual oddball task: a comparison between conventional and EEG-informed fMRI  
712 analysis. *J Cogn Neurosci*. 2012;24(8):1682–94.
- 713 80. Bocquillon P, Bourriez J-L, Palmero-Soler E, Betrouni N, Houdayer E, Derambure P, et al. Use of  
714 swLORETA to localize the cortical sources of target-and distracter-elicited P300 components. *Clin*  
715 *Neurophysiol*. 2011;122(10):1991–2002.
- 716 81. Rubia K, Hyde Z, Halari R, Giampietro V, Smith A. Effects of age and sex on developmental neural  
717 networks of visual--spatial attention allocation. *Neuroimage*. 2010;51(2):817–27.
- 718 82. Brázdil M, Mikl M, Mareček R, Krupa P, Rektor I. Effective connectivity in target stimulus processing:  
719 a dynamic causal modeling study of visual oddball task. *Neuroimage*. 2007;35(2):827–35.
- 720 83. Babiloni F, Cincotti F, Babiloni C, Carducci F, Mattia D, Astolfi L, et al. Estimation of the cortical  
721 functional connectivity with the multimodal integration of high-resolution EEG and fMRI data by  
722 directed transfer function. *Neuroimage*. 2005;24(1):118–31.
- 723 84. Ardekani BA, Choi SJ, Hossein-Zadeh G-A, Porjesz B, Tanabe JL, Lim KO, et al. Functional magnetic  
724 resonance imaging of brain activity in the visual oddball task. *Cogn Brain Res*. 2002;14(3):347–56.
- 725 85. Kiehl KA, Laurens KR, Duty TL, Forster BB, Liddle PF. An event-related fMRI study of visual and  
726 auditory oddball tasks. *J Psychophysiol*. 2001;15(4):221.
- 727 86. Stevens AA, Skudlarski P, Gatenby JC, Gore JC. Event-related fMRI of auditory and visual oddball  
728 tasks. *Magn Reson Imaging*. 2000;18(5):495–502.
- 729 87. Clark VP, Fannon S, Lai S, Benson R, Bauer L. Responses to rare visual target and distractor stimuli  
730 using event-related fMRI. *J Neurophysiol*. 2000;83(5):3133–9.

- 731 88. Downar J, Crawley AP, Mikulis DJ, Davis KD. A multimodal cortical network for the detection of  
732 changes in the sensory environment. *Nat Neurosci.* 2000;3(3):277.
- 733 89. Kirino E, Belger A, Goldman-Rakic P, McCarthy G. Prefrontal activation evoked by infrequent target  
734 and novel stimuli in a visual target detection task: an event-related functional magnetic resonance  
735 imaging study. *J Neurosci.* 2000;20(17):6612–8.
- 736 90. Yan B, Miyamoto A. A comparative study of modal parameter identification based on wavelet and  
737 Hilbert--Huang transforms. *Comput Civ Infrastruct Eng.* 2006;21(1):9–23.
- 738 91. Bruns A. Fourier-, Hilbert-and wavelet-based signal analysis: are they really different approaches? *J*  
739 *Neurosci Methods.* 2004;137(2):321–32.
- 740 92. Li D, Li X, Cui D, Li Z. Phase synchronization with harmonic wavelet transform with application to  
741 neuronal populations. *Neurocomputing.* 2011;74(17):3389–403.
- 742 93. Van Dinteren R, Huster RJ, Jongsma MLA, Kessels RPC, Arns M. Differences in cortical sources of the  
743 event-related P3 potential between young and old participants indicate frontal compensation. *Brain*  
744 *Topogr.* 2018;31(1):35–46.
- 745 94. Zhou L, Wang G, Nan C, Wang H, Liu Z, Bai H. Abnormalities in P300 components in depression: an  
746 ERP-sLORETA study. *Nord J Psychiatry.* 2018;1–8.
- 747 95. Hong X, Wang Y, Sun J, Li C, Tong S. Segregating Top-Down Selective Attention from Response  
748 Inhibition in a Spatial Cueing Go/NoGo Task: An ERP and Source Localization Study. *Sci Rep.*  
749 2017;7(1):9662.
- 750 96. Yang P, Fan C, Wang M, Fogelson N, Li L. The effects of changes in object location on object identity  
751 detection: A simultaneous EEG-fMRI study. *Neuroimage.* 2017;157:351–63.
- 752 97. Overbye K, Huster RJ, Walhovd KB, Fjell AM, Tamnes CK. Development of the P300 from childhood  
753 to adulthood: a multimodal EEG and MRI study. *Brain Struct Funct.* 2018;223(9):4337–49.
- 754 98. Naeije G, Vaulet T, Wens V, Marty B, Goldman S, De Tiège X. Multilevel cortical processing of  
755 somatosensory novelty: a magnetoencephalography study. *Front Hum Neurosci.* 2016;10:259.
- 756 99. Kabbara A, Khalil M, El-Falou W, Eid H, Hassan M. Functional Brain Connectivity as a New Feature  
757 for P300 Speller. *PLoS One.* 2016;11(1):e0146282.



- 758 100. Warbrick T, Mobascher A, Brinkmeyer J, Musso F, Richter N, Stoecker T, et al. Single-trial P3  
759 amplitude and latency informed event-related fMRI models yield different BOLD response patterns to a  
760 target detection task. *Neuroimage*. 2009;47(4):1532–44.
- 761 101. Laurens KR, Kiehl KA, Liddle PF. A supramodal limbic-paralimbic-neocortical network supports goal-  
762 directed stimulus processing. *Hum Brain Mapp*. 2005;24(1):35–49.
- 763 102. Wynn JK, Jimenez AM, Roach BJ, Korb A, Lee J, Horan WP, et al. Impaired target detection in  
764 schizophrenia and the ventral attentional network: findings from a joint event-related potential--  
765 functional MRI analysis. *NeuroImage Clin*. 2015;9:95–102.
- 766 103. Campanella S, Bourguignon M, Peigneux P, Metens T, Nouali M, Goldman S, et al. BOLD response to  
767 deviant face detection informed by P300 event-related potential parameters: A simultaneous ERP--fMRI  
768 study. *Neuroimage*. 2013;71:92–103.
- 769 104. Shenhav A, Botvinick MM, Cohen JD. The expected value of control: an integrative theory of anterior  
770 cingulate cortex function. *Neuron*. 2013;79(2):217–40.
- 771 105. Li Y, Wang L-Q, Hu Y. Localizing P300 generators in high-density event-related potential with fMRI.  
772 *Med Sci Monit*. 2009;15(3):MT47--MT53.
- 773 106. Harsay HA, Spaan M, Wijnen JG, Ridderinkhof KR. Error awareness and salience processing in the  
774 oddball task: shared neural mechanisms. *Front Hum Neurosci*. 2012;6:246.
- 775 107. Ragazzoni A, Di Russo F, Fabbri S, Pesaresi I, Di Rollo A, Perri RL, et al. “Hit the missing stimulus”.  
776 A simultaneous EEG-fMRI study to localize the generators of endogenous ERPs in an omitted target  
777 paradigm. *Sci Rep*. 2019;9(1):3684.
- 778 108. Cieslik EC, Zilles K, Grefkes C, Eickhoff SB. Dynamic interactions in the fronto-parietal network  
779 during a manual stimulus--response compatibility task. *Neuroimage*. 2011;58(3):860–9.
- 780 109. Bénar C-G, Schön D, Grimault S, Nazarian B, Burle B, Roth M, et al. Single-trial analysis of oddball  
781 event-related potentials in simultaneous EEG-fMRI. *Hum Brain Mapp*. 2007;28(7):602–13.
- 782 110. Bledowski C, Prvulovic D, Goebel R, Zanella FE, Linden DEJ. Attentional systems in target and  
783 distractor processing: a combined ERP and fMRI study. *Neuroimage*. 2004;22(2):530–40.
- 784 111. Staffen W, Ladurner G, Höller Y, Bergmann J, Aichhorn M, Golaszewski S, et al. Brain activation

- 785 disturbance for target detection in patients with mild cognitive impairment: an fMRI study. *Neurobiol*  
786 *Aging*. 2012;33(5):1002--e1.
- 787 112. Cui H, Xie X, Xu S, Yan H, Feng L, Hu Y. Source analysis of bimodal event-related potentials with  
788 auditory-visual stimuli. In: 2013 6th International IEEE/EMBS Conference on Neural Engineering  
789 (NER). 2013. p. 85–8.
- 790 113. Helenius P, Laasonen M, Hokkanen L, Paetau R, Niemivirta M. Neural correlates of late positivities  
791 associated with infrequent visual events and response errors. *Neuroimage*. 2010;53(2):619–28.
- 792 114. Bledowski C, Prvulovic D, Hoechstetter K, Scherg M, Wibral M, Goebel R, et al. Localizing P300  
793 generators in visual target and distractor processing: a combined event-related potential and functional  
794 magnetic resonance imaging study. *J Neurosci*. 2004;24(42):9353–60.
- 795 115. Li F, Chen B, Li H, Zhang T, Wang F, Jiang Y, et al. The time-varying networks in P300: a task-evoked  
796 EEG study. *IEEE Trans Neural Syst Rehabil Eng*. 2016;24(7):725–33.
- 797 116. Li F, Liu T, Wang F, Li H, Gong D, Zhang R, et al. Relationships between the resting-state network and  
798 the P3: Evidence from a scalp EEG study. *Sci Rep*. 2015;5:15129.
- 799 117. Rusiniak M, Lewandowska M, Wolak T, Pluta A, Milner Rafałand Ganc M, Włodarczyk A, et al. A  
800 modified oddball paradigm for investigation of neural correlates of attention: a simultaneous ERP--  
801 fMRI study. *Magn Reson Mater Physics, Biol Med*. 2013;26(6):511–26.
- 802 118. Babiloni C, Del Percio C, Triggiani AI, Marzano N, Valenzano A, De Rosas M, et al. Frontal-parietal  
803 responses to “oddball” stimuli depicting “fattened” faces are increased in successful dieters: An  
804 electroencephalographic study. *Int J Psychophysiol*. 2011;82(2):153–66.
- 805 119. Taylor KS, Seminowicz DA, Davis KD. Two systems of resting state connectivity between the insula  
806 and cingulate cortex. *Hum Brain Mapp*. 2009;30(9):2731–45.
- 807 120. Cavanna AE, Trimble MR. The precuneus: a review of its functional anatomy and behavioural  
808 correlates. *Brain*. 2006;129(3):564–83.
- 809 121. Tsolaki AC, Kosmidou V, Kompatsiaris IY, Papadaniil C, Hadjileontiadis L, Adam A, et al. Brain  
810 source localization of MMN and P300 ERPs in mild cognitive impairment and Alzheimer’s disease: a  
811 high-density EEG approach. *Neurobiol Aging*. 2017;55:190–201.

- 812 122. Papadaniil CD, Kosmidou VE, Tsolaki A, Tsolaki M, Kompatsiaris IY, Hadjileontiadis LJ. Cognitive  
813 MMN and P300 in mild cognitive impairment and Alzheimer's disease: A high density EEG-3D vector  
814 field tomography approach. *Brain Res.* 2016;1648:425–33.
- 815 123. Jiang S, Qu C, Wang F, Liu Y, Qiao Z, Qiu X, et al. Using event-related potential P300 as an  
816 electrophysiological marker for differential diagnosis and to predict the progression of mild cognitive  
817 impairment: a meta-analysis. *Neurol Sci.* 2015;36(7):1105–12.
- 818

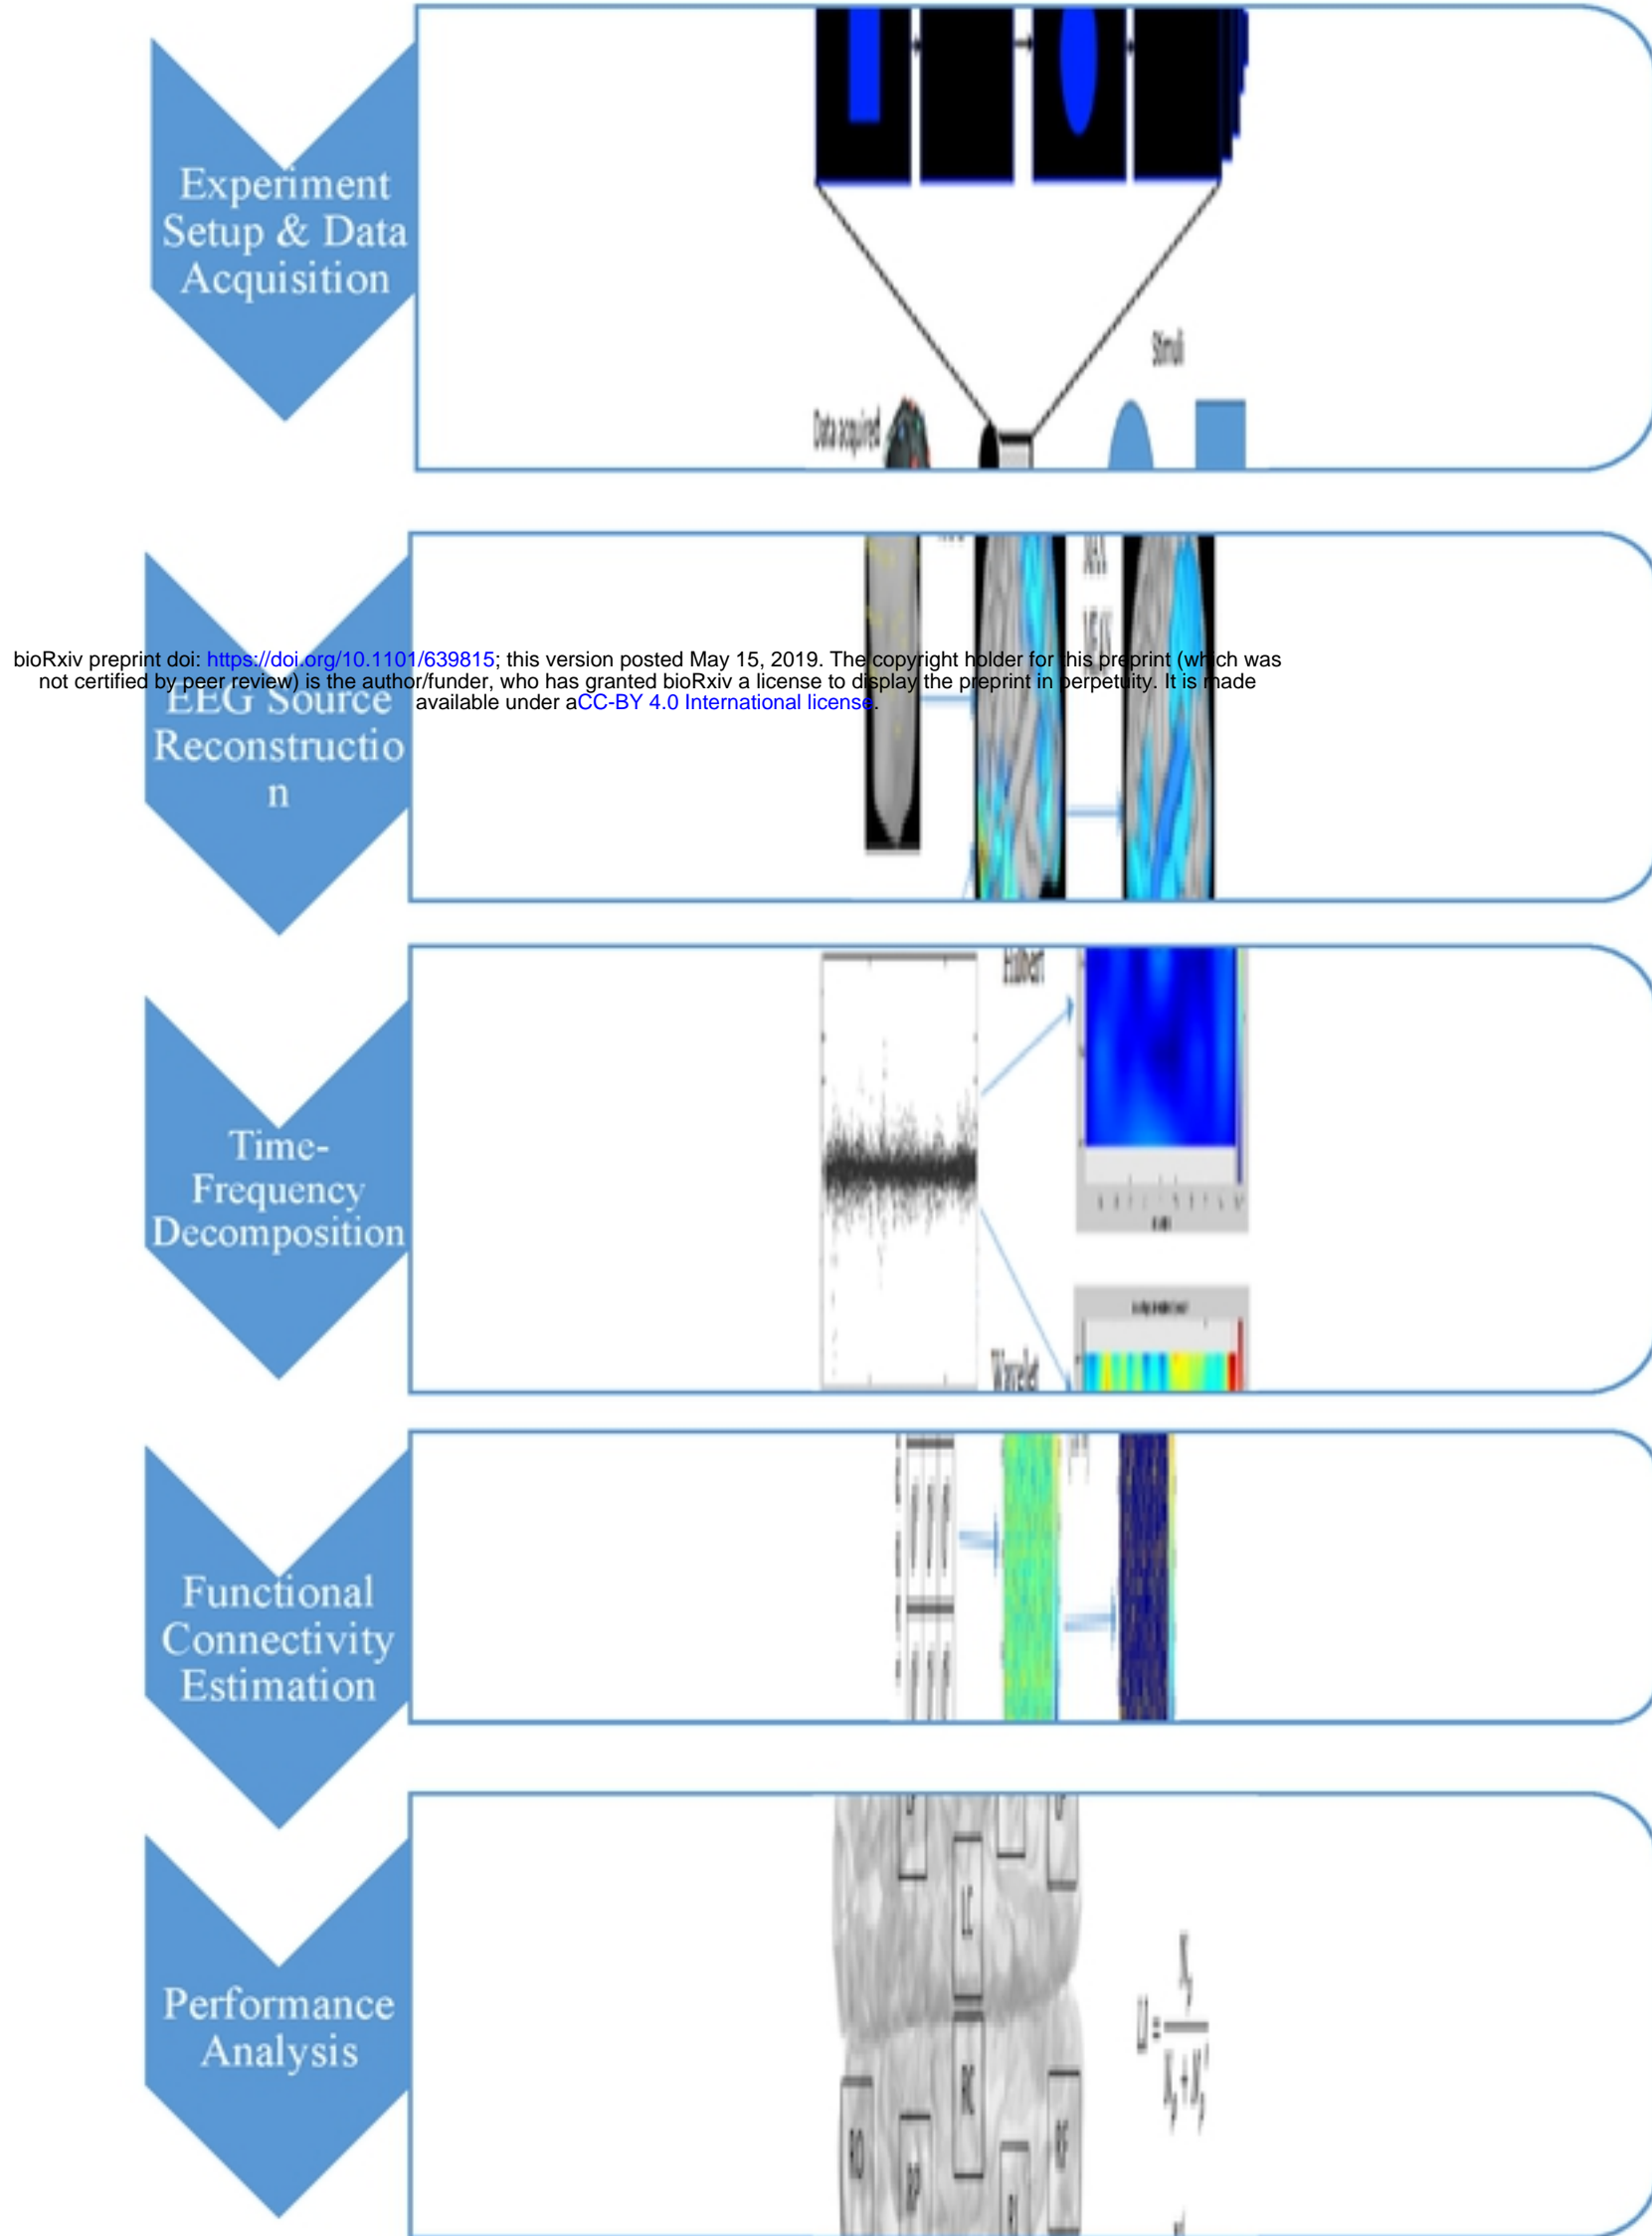

**Fig 1. Flow chart of the study.**

Top Bottom Left Right Front Back

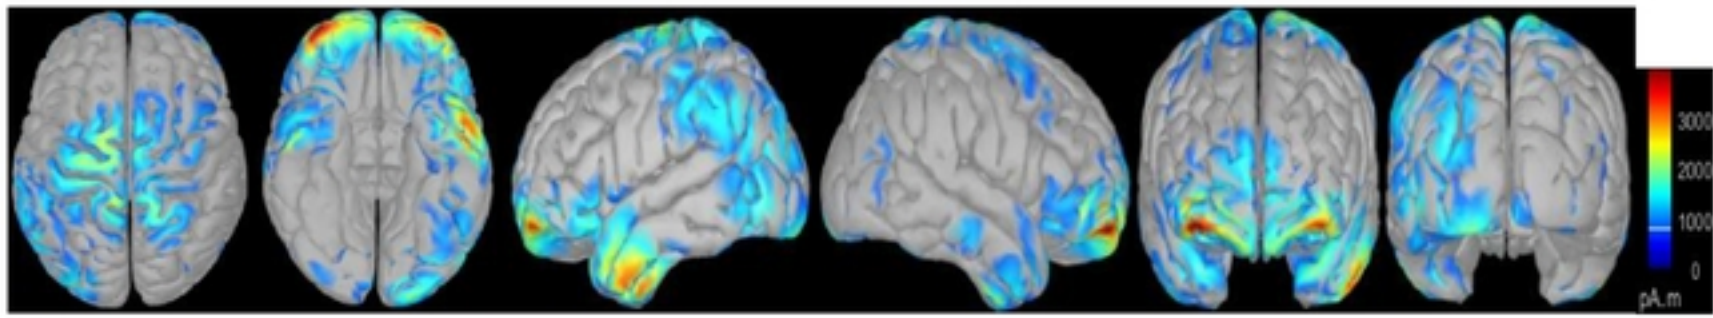

(A)

bioRxiv preprint doi: <https://doi.org/10.1101/639815>; this version posted May 15, 2019. The copyright holder for this preprint (which was not certified by peer review) is the author/funder, who has granted bioRxiv a license to display the preprint in perpetuity. It is made available under aCC-BY 4.0 International license.

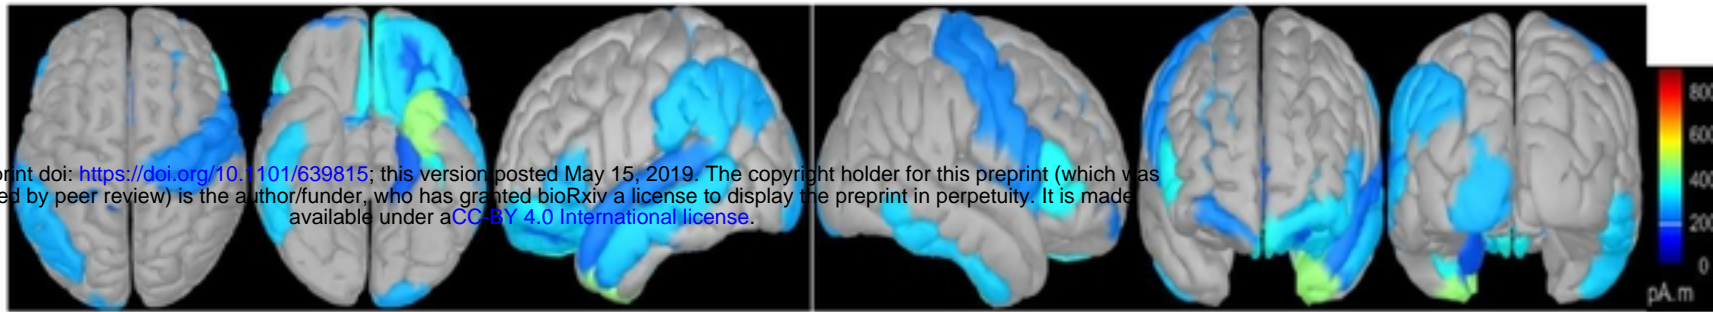

(B)

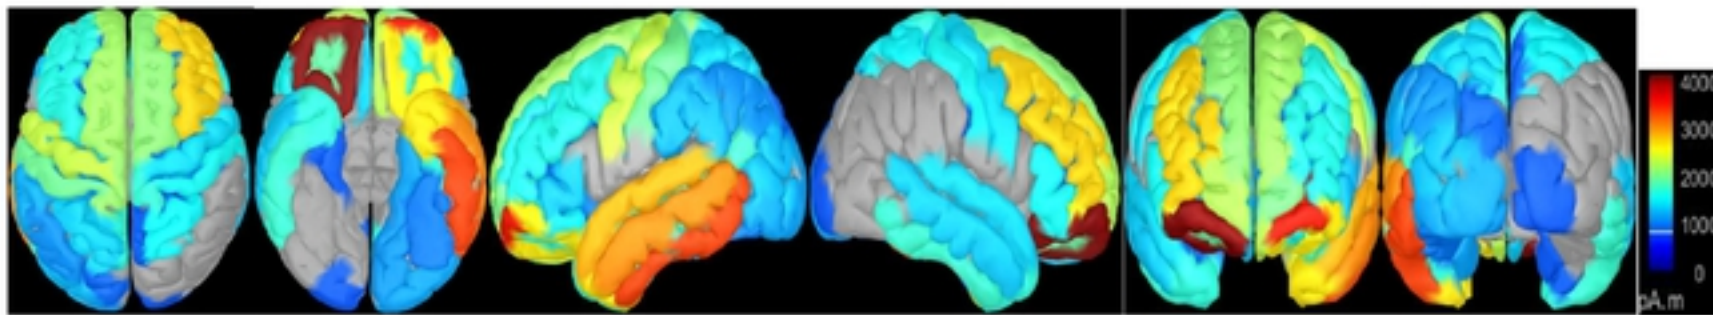

(C)

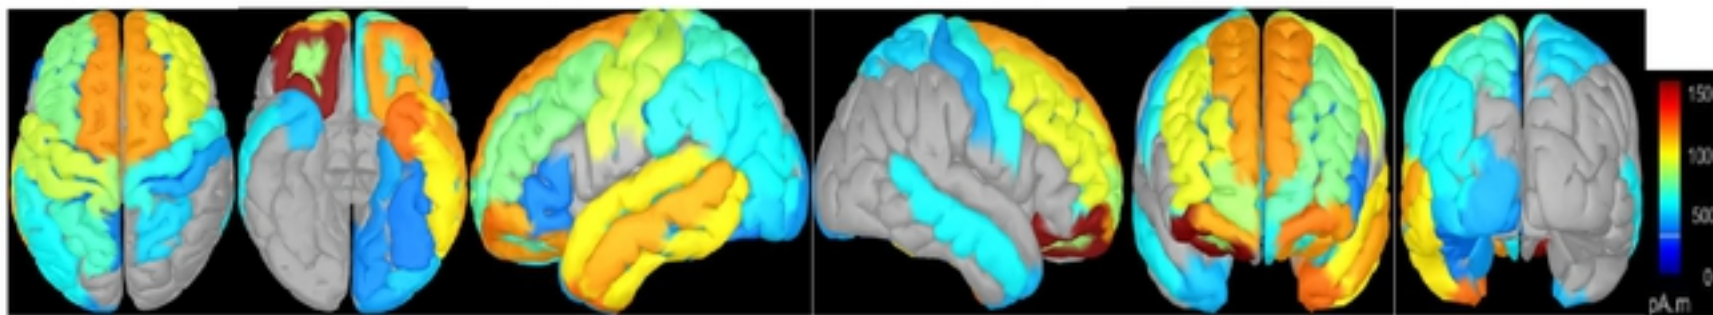

(D)

**Fig 2. Different views of reconstructed sources on the cortical surface (A) and respective regional cortical sources using different downsampling scout functions: MEAN (B), MAX (C) and PCA (D).**

### Wavelet Transform

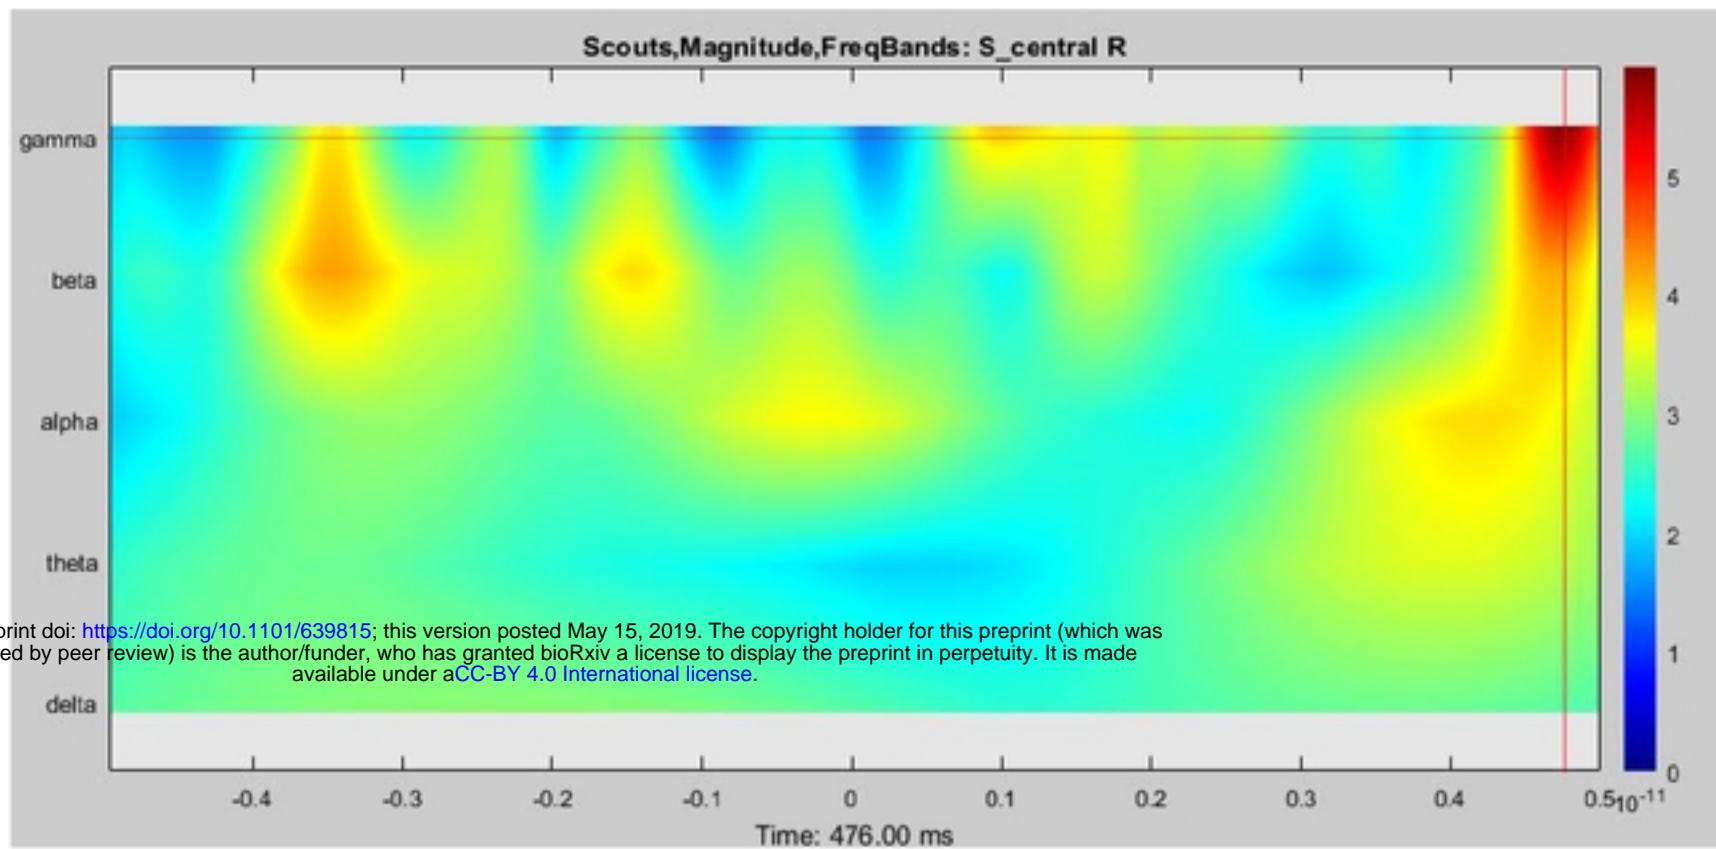

### Hilbert Transform

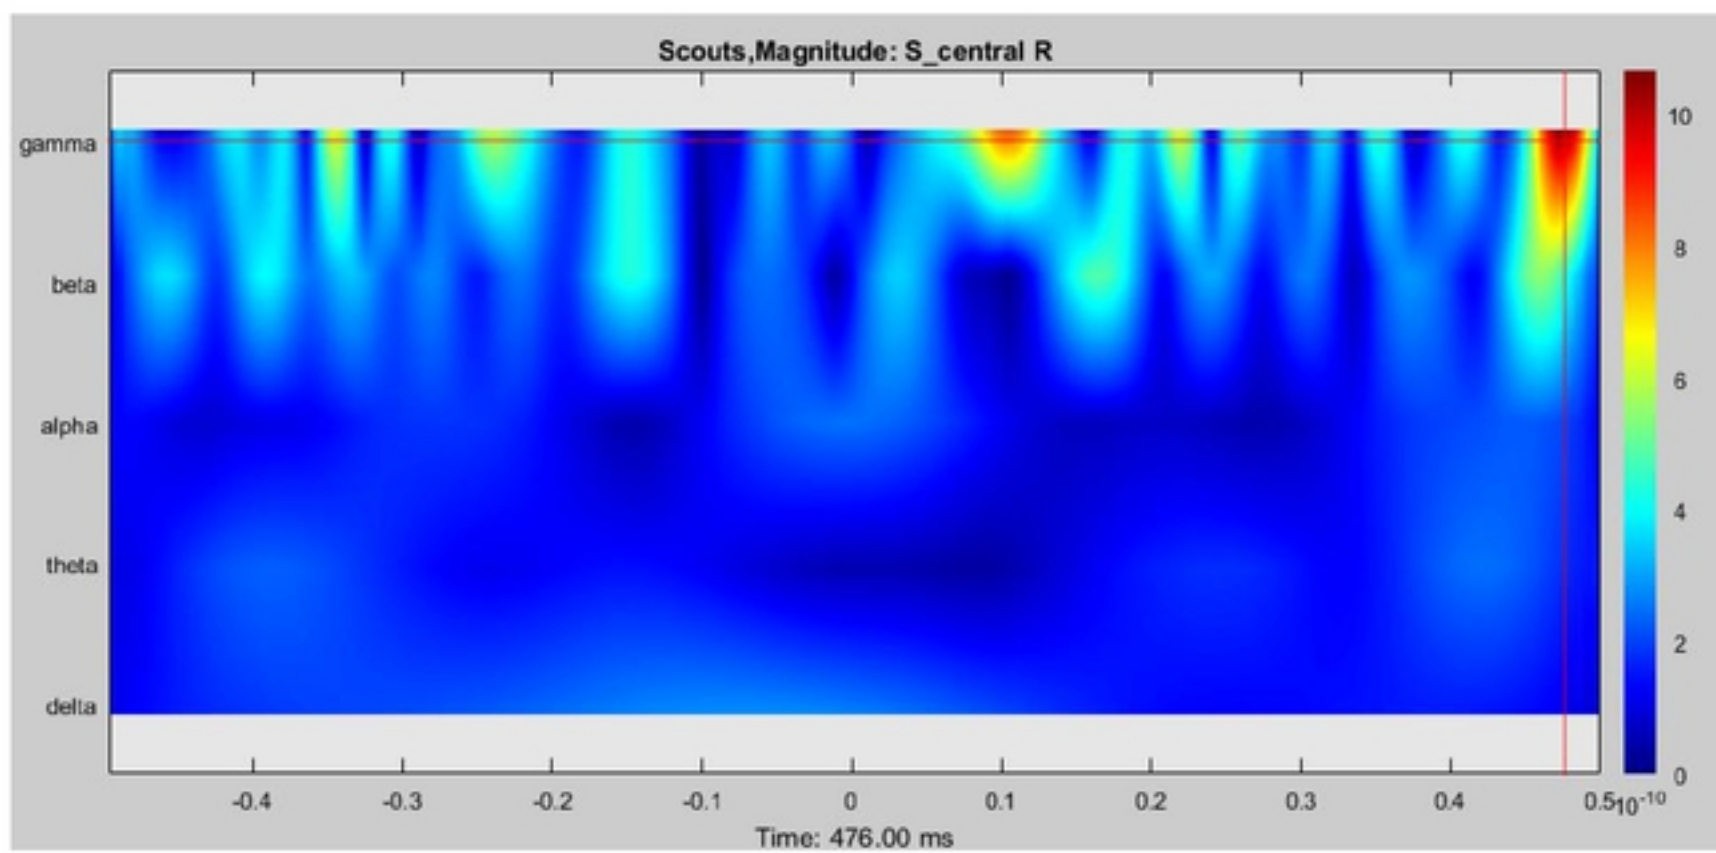

**Fig 3. Magnitude of time-frequency decomposition for a central region from Destrieux atlas. Upper panel: Wavelet Transform; Lower panel: Hilbert Transform**

Hilbert Transform

Wavelet Transform

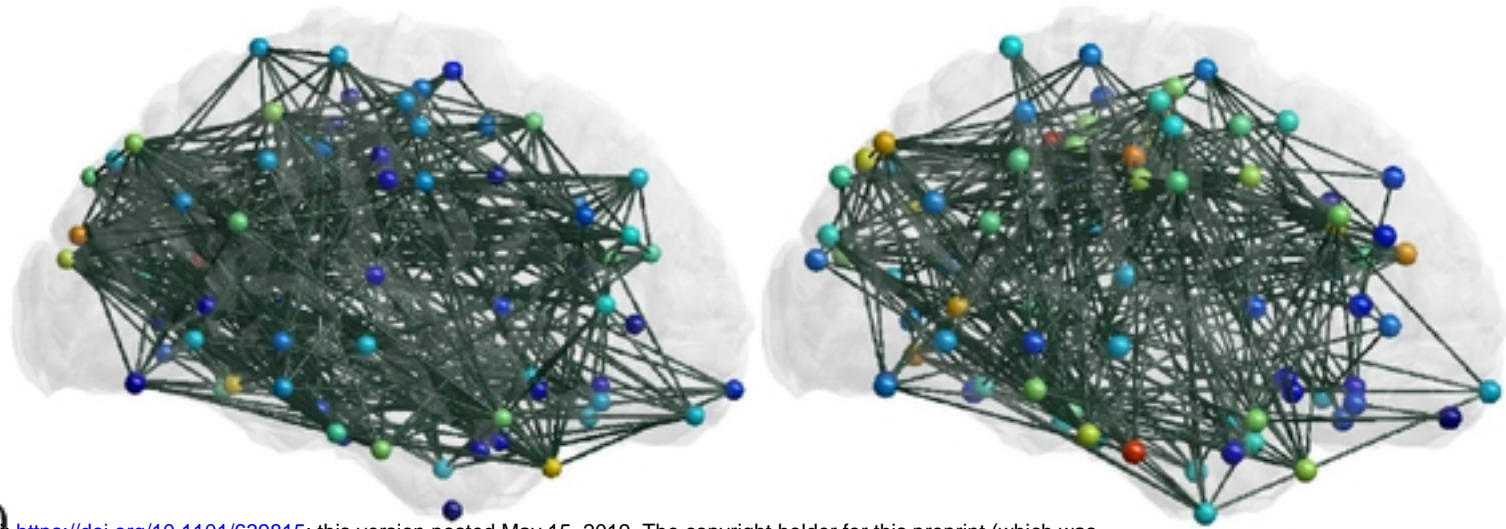

(A) bioRxiv preprint doi: <https://doi.org/10.1101/639815>; this version posted May 15, 2019. The copyright holder for this preprint (which was not certified by peer review) is the author/funder, who has granted bioRxiv a license to display the preprint in perpetuity. It is made available under aCC-BY 4.0 International license.

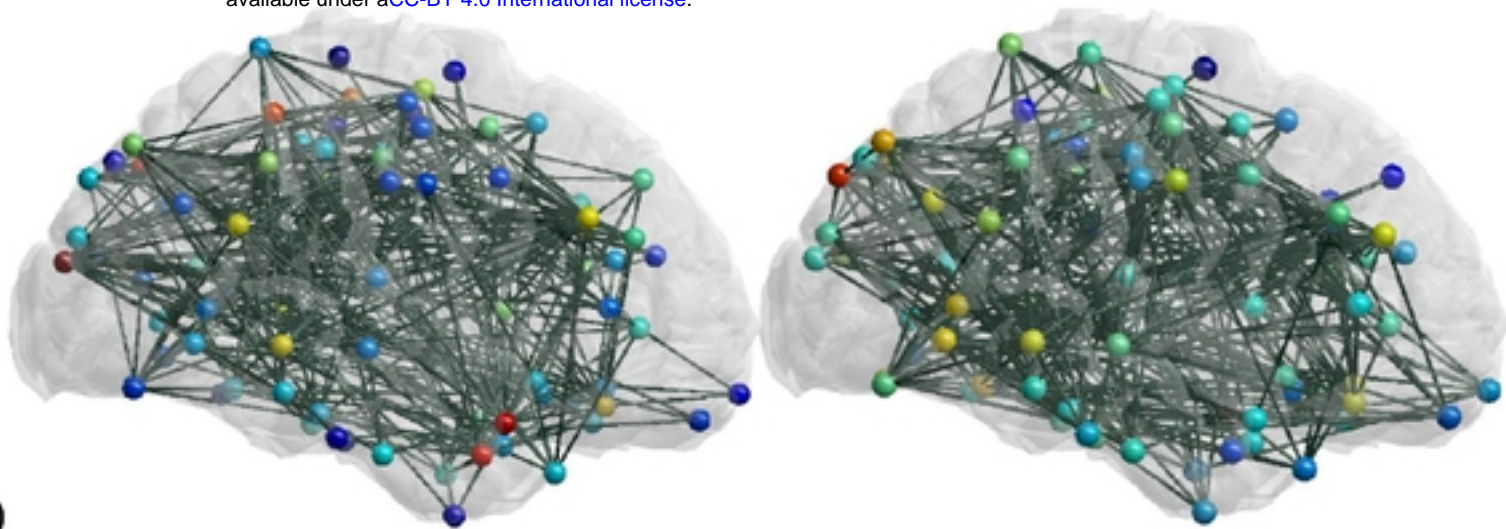

(B)

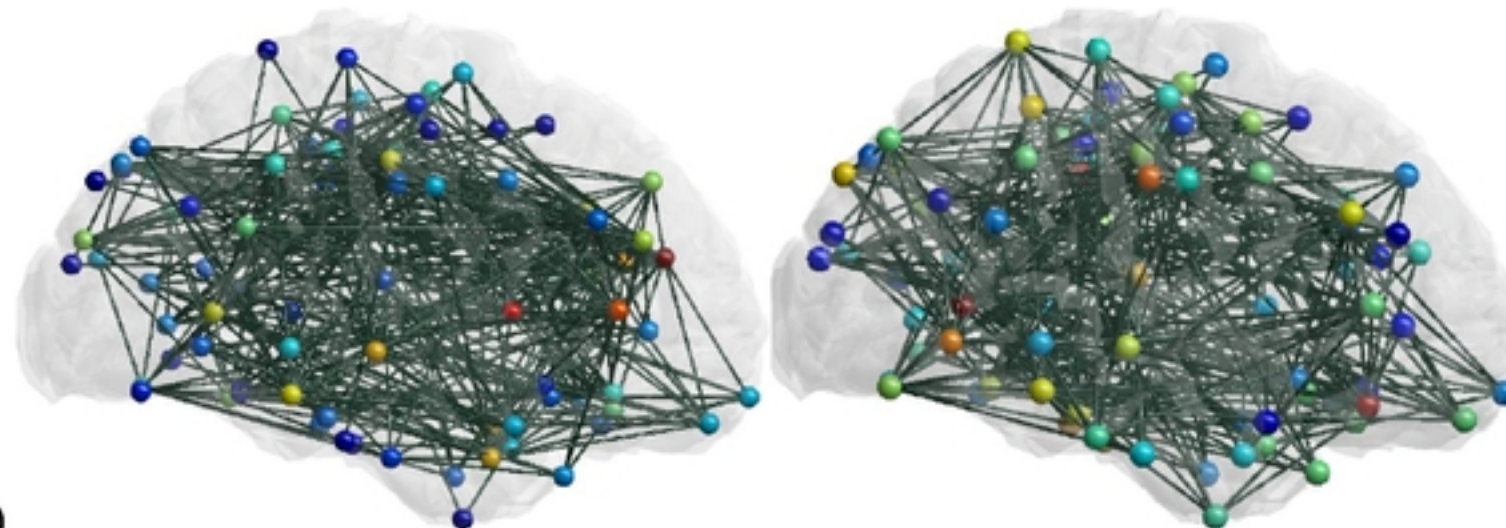

(C)

**Fig 4. Connectivity estimated by PLV based on the instantaneous phases extracted using Hilbert Transform (left panel) and Wavelet Transform (right panel) from regional time series downsampled by different scout functions: (A). MEAN; (B). MAX; (C). PCA.**

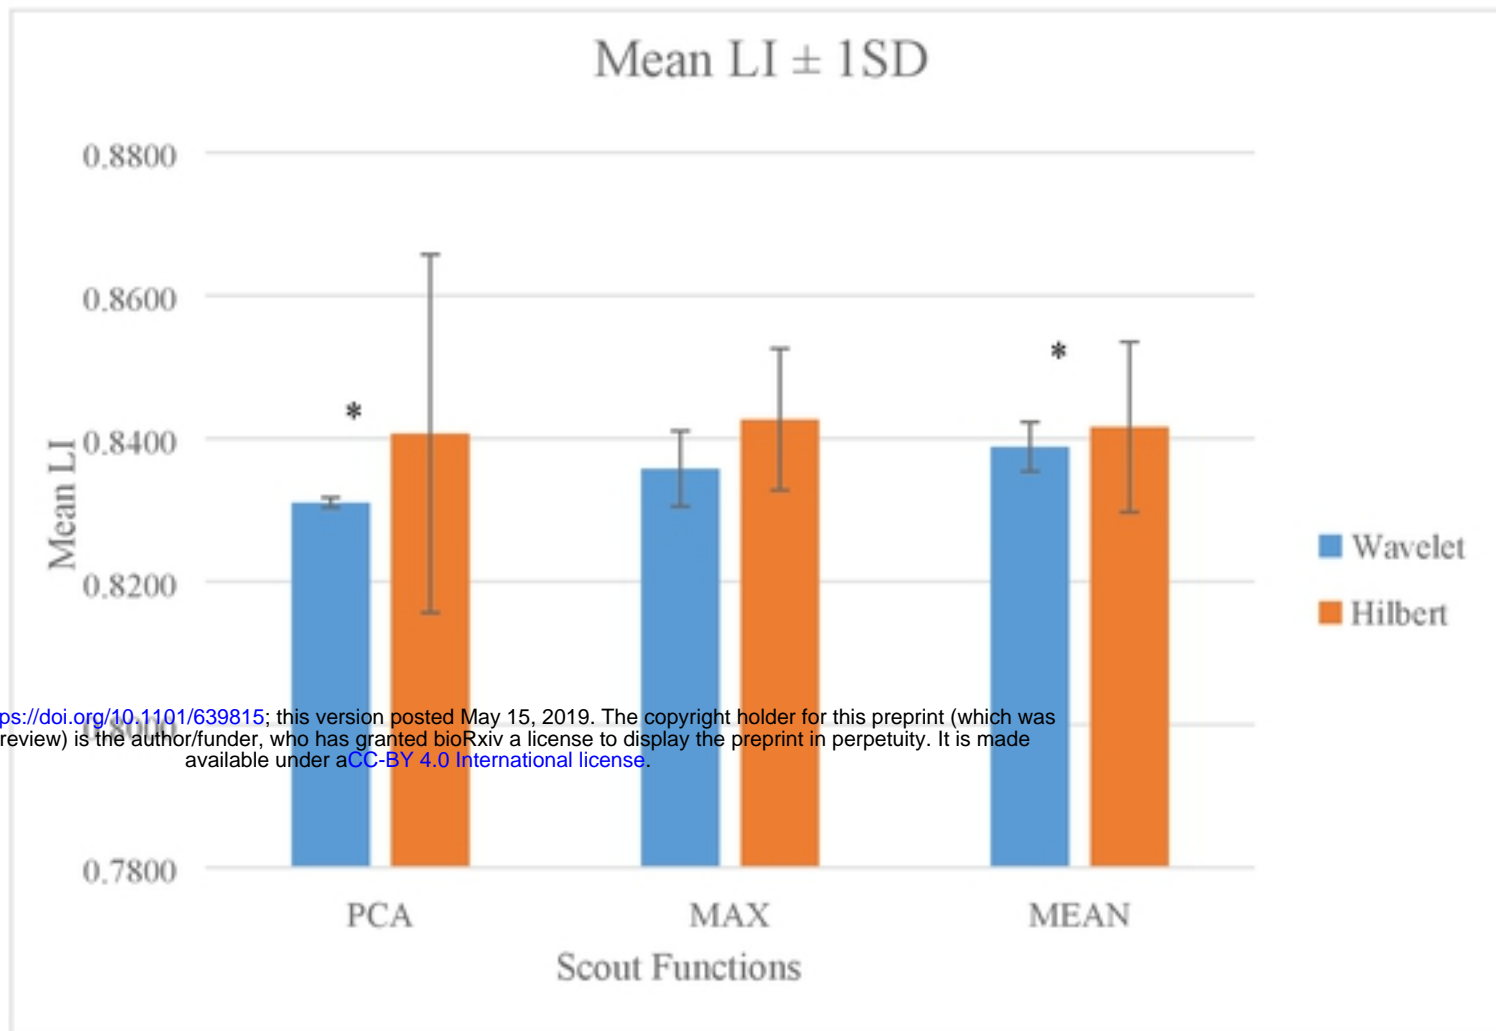

bioRxiv preprint doi: <https://doi.org/10.1101/639815>; this version posted May 15, 2019. The copyright holder for this preprint (which was not certified by peer review) is the author/funder, who has granted bioRxiv a license to display the preprint in perpetuity. It is made available under aCC-BY 4.0 International license.

**Fig 5. Comparison of averaged LI values between different time-frequency decomposition algorithms for different scout functions.** Asterisk above the bars indicates significant difference ( $P \leq 0.05$ ). (LI: Localization Index; SD: Standard Deviation).



bioRxiv preprint doi: <https://doi.org/10.1101/639815>; this version posted May 15, 2019. The copyright holder for this preprint (which was not certified by peer review) is the author/funder, who has granted bioRxiv a license to display the preprint in perpetuity. It is made available under aCC-BY 4.0 International license.

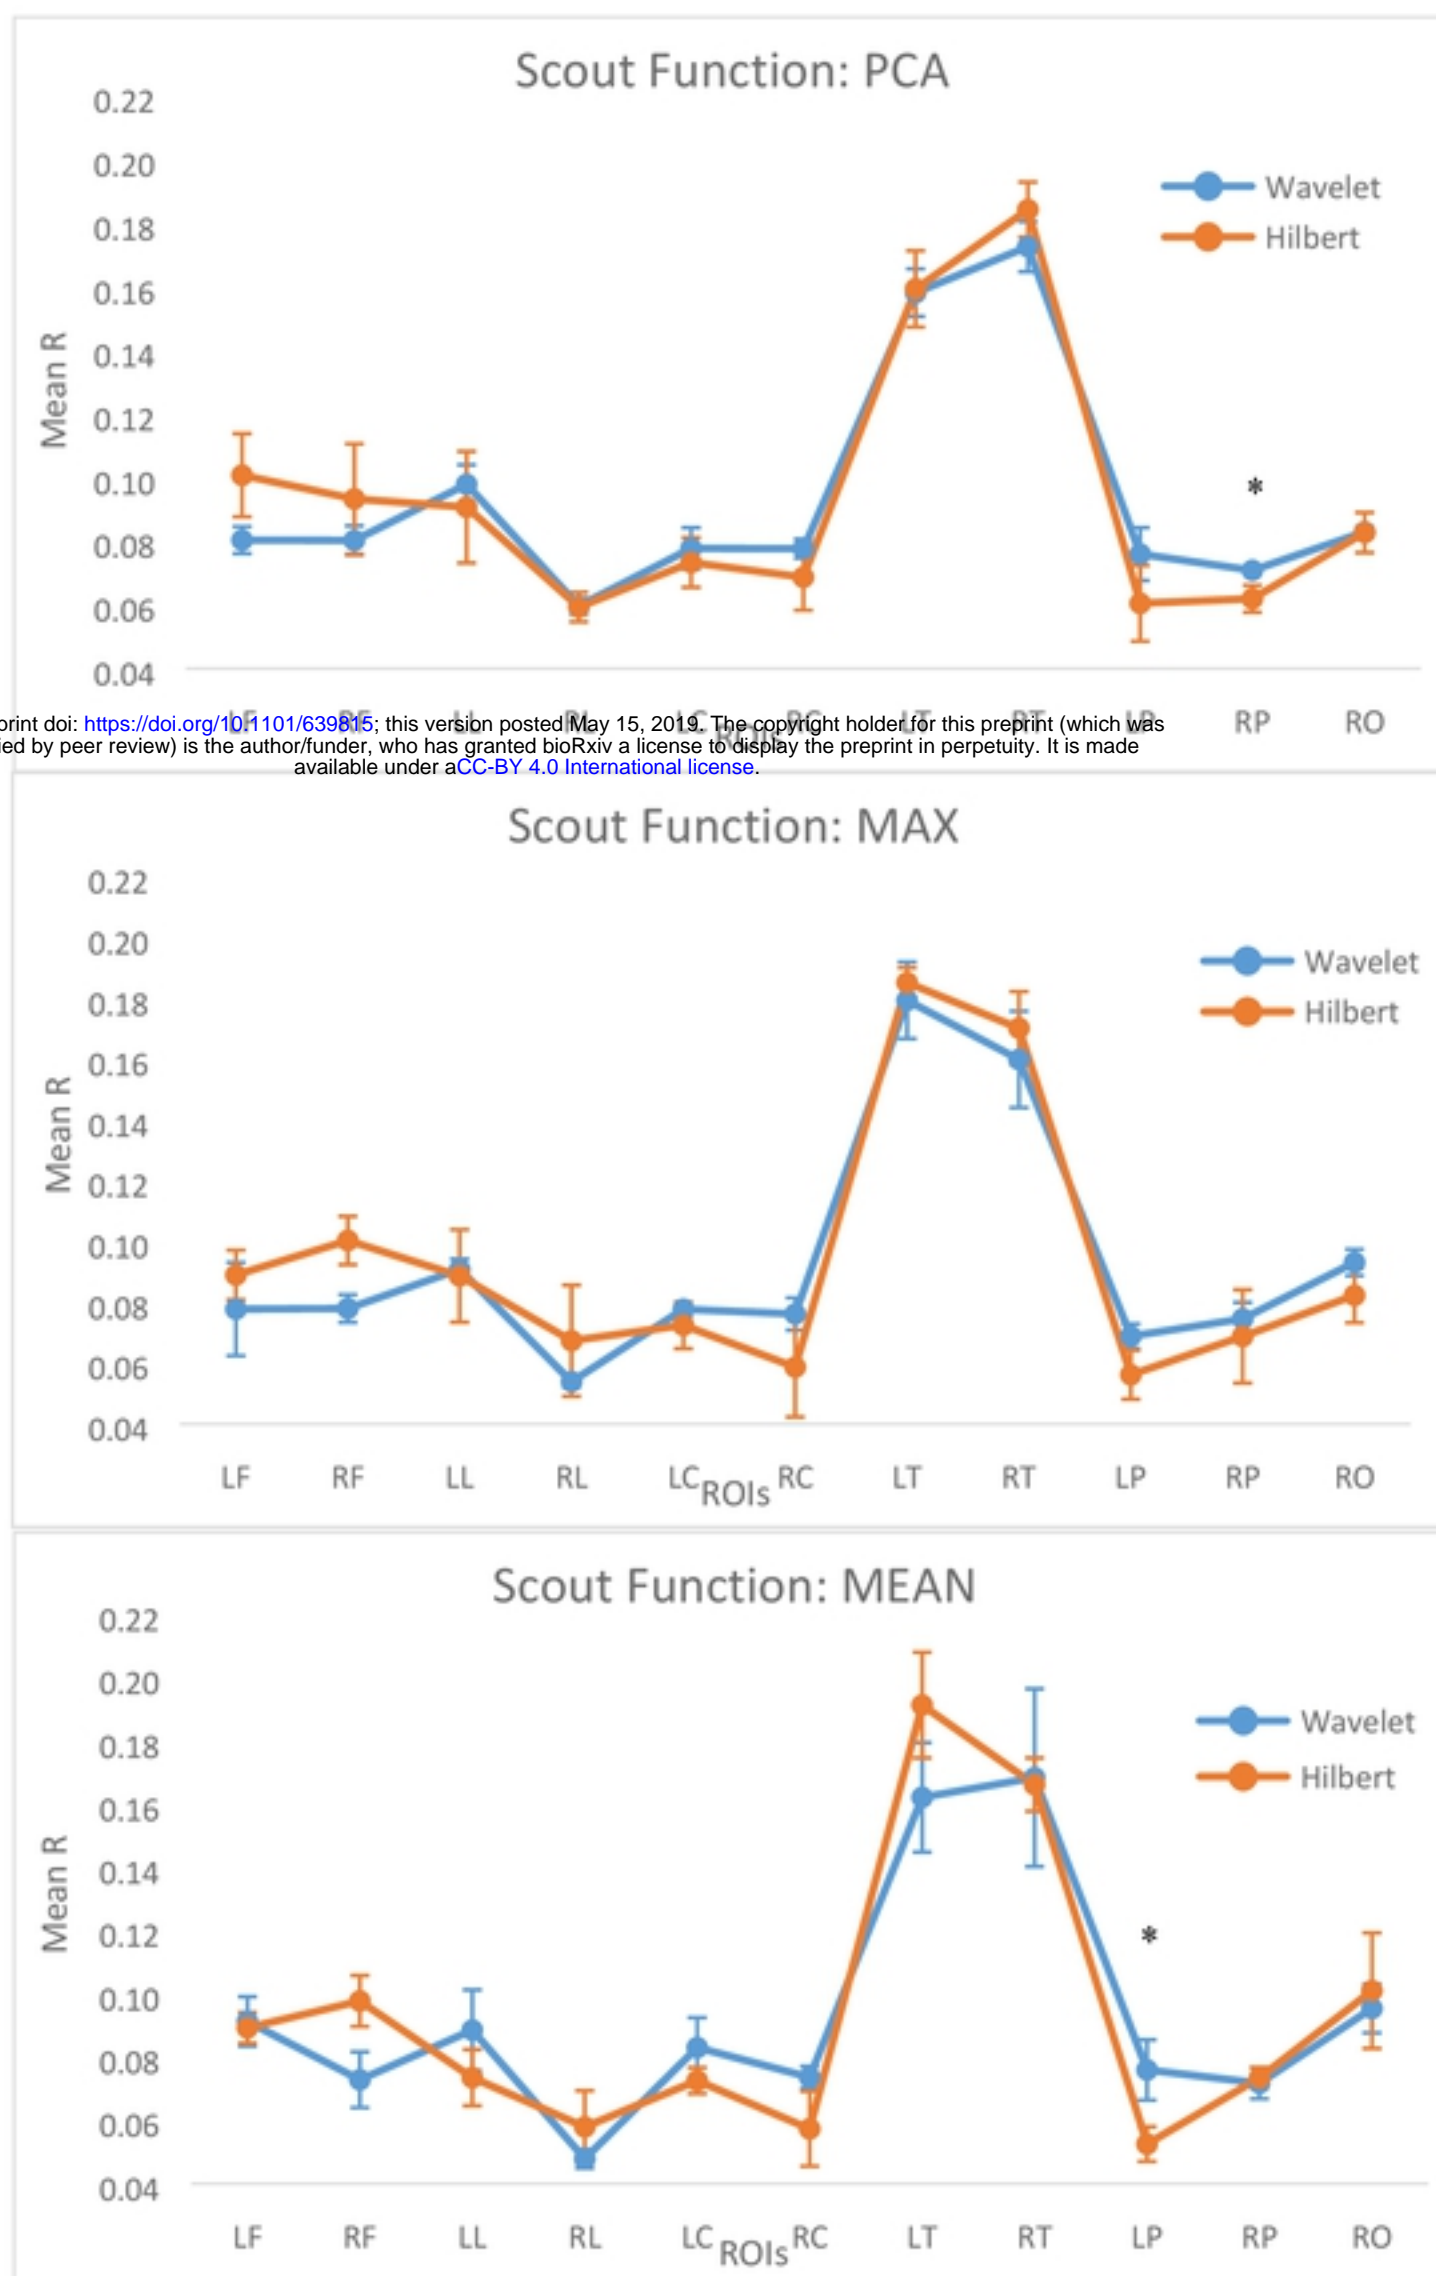

**Fig 6. The mean and standard deviations of the R values (ratio of the identified connections within each ROI) obtained for the different scout functions.**

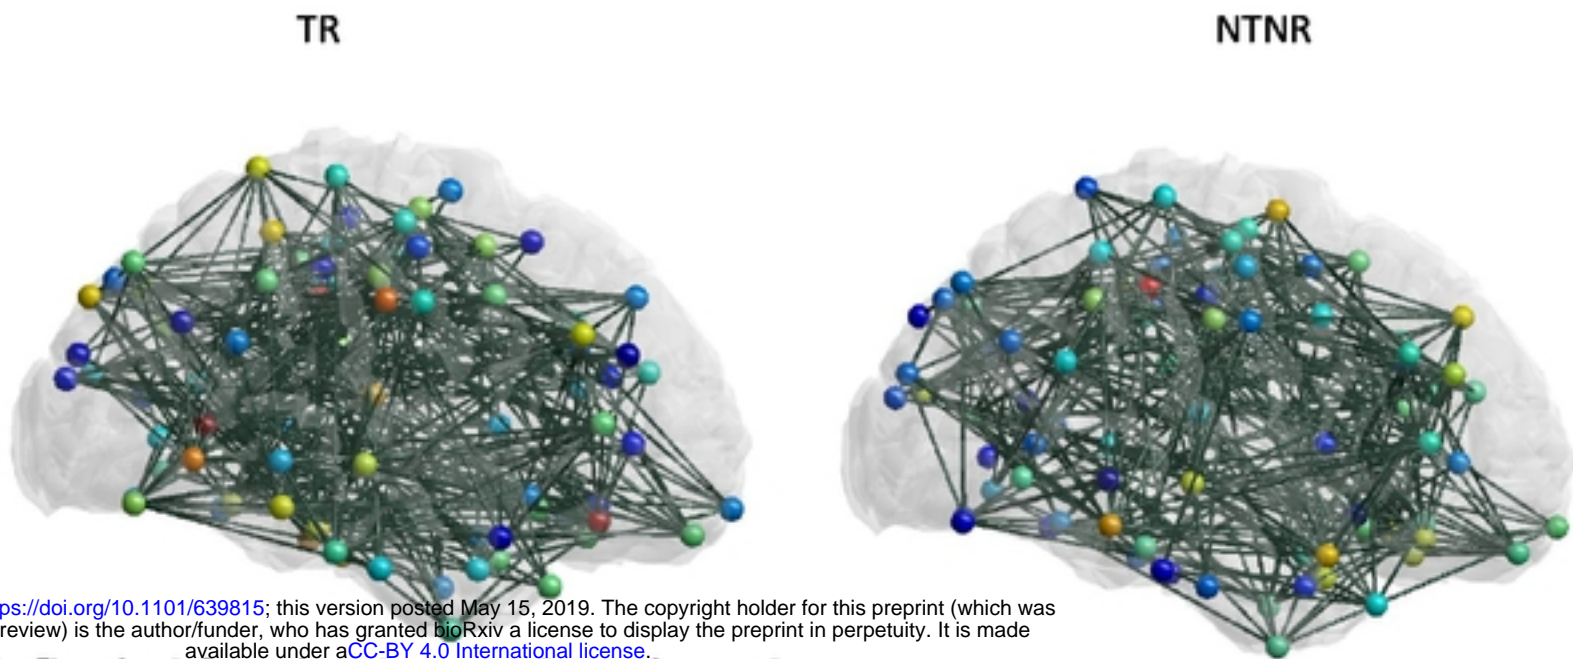

bioRxiv preprint doi: <https://doi.org/10.1101/639815>; this version posted May 15, 2019. The copyright holder for this preprint (which was not certified by peer review) is the author/funder, who has granted bioRxiv a license to display the preprint in perpetuity. It is made available under aCC-BY 4.0 International license.

**Fig 7. Cortical functional networks estimated using PLV based on the instantaneous phases extracted by Wavelet Transform/PCA pair for two oddball cases. Left panel: TR case; Right panel: NTNR case**

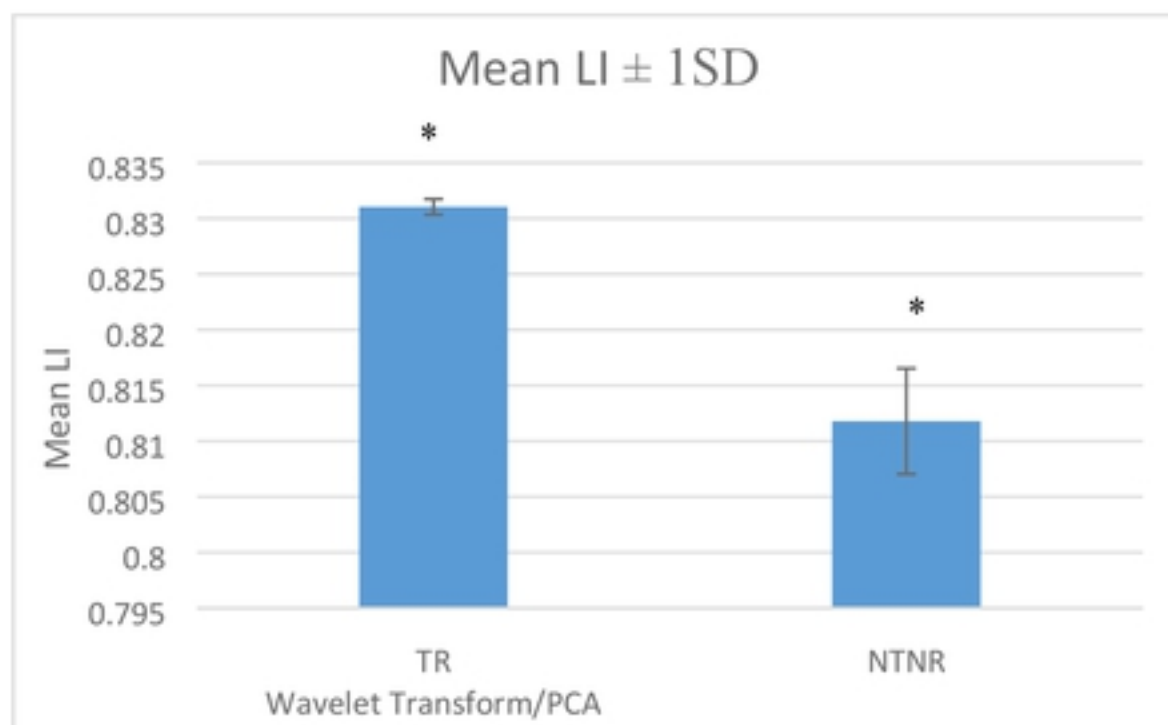

**Fig 8. Comparison of mean LI between TR and NTNR cases. Asterisk above the bars indicates significant difference ( $P \leq 0.05$ ). LI: Localization Index; SD: Standard Deviation.**

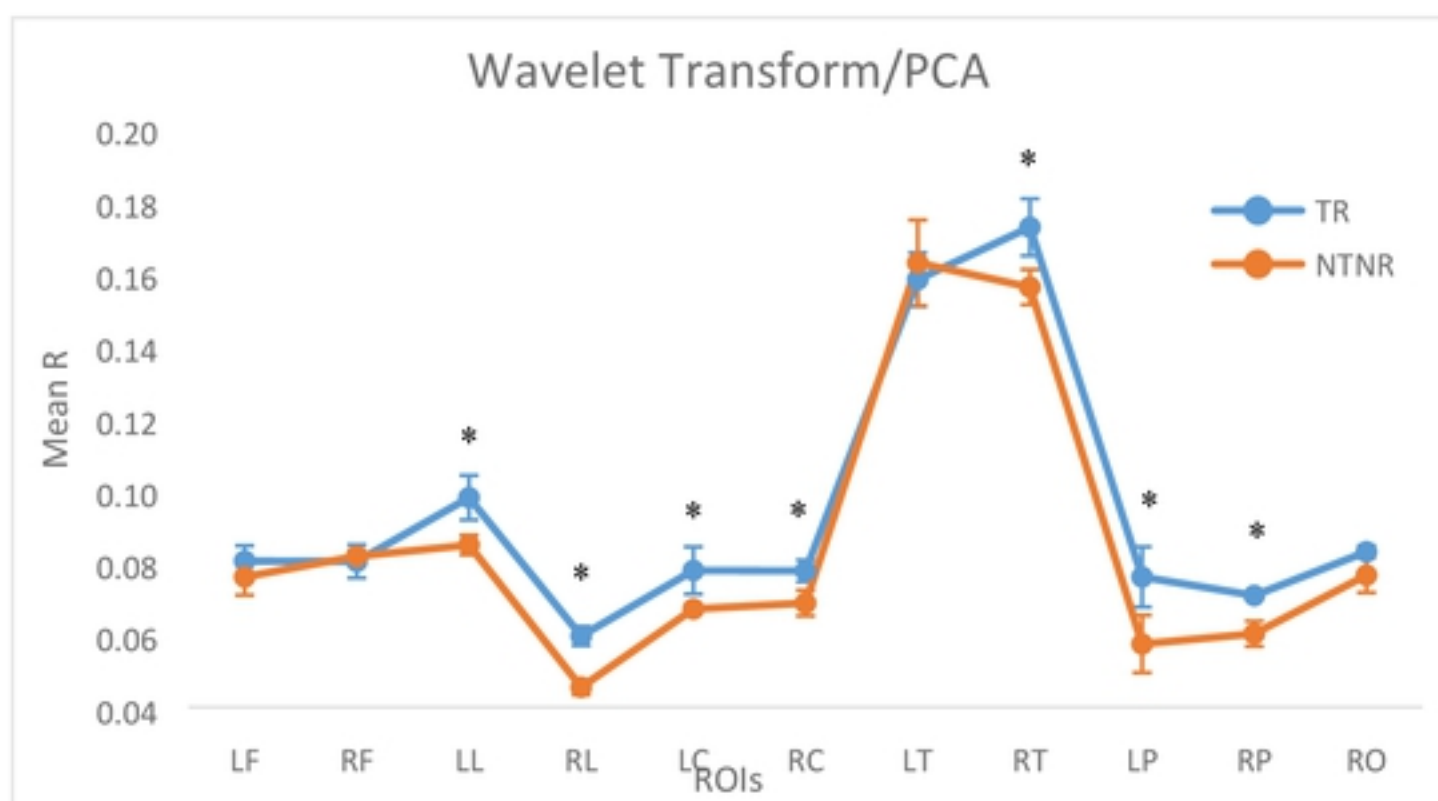

**Fig 9. Comparison of mean R between TR and NTNR cases.** Asterisk above the lines indicates significant difference ( $P \leq 0.05$ ). R: ratio of the identified connections for within each ROI; SD: Standard Deviation.
